# Supplementary material for: Sustainable production of carbazole-based BioAIEgens from lignin major motifs
Source: Royal Society of Chemistry journal article supplement (doi:10.1039/d3gc04384c), 2024-01-01
Supplement: d3gc04384c1.pdf [file d3gc04384c1.pdf]

## Supporting Information

### **Sustainable production of carbazole-based BioALEgens from lignin major motifs**

Jianwei Ji,<sup>a#</sup> Chuangchi Ding,<sup>a#</sup> Shouji Li,<sup>b,c#</sup> Tenglong Guo,<sup>d</sup> Julian Skagfjörd  
Reinhold,<sup>d,e</sup> Sen Meng,<sup>a</sup> Wenqing Zhu,<sup>d</sup> Xiaohui Ji,<sup>a</sup> Xu-Min Cai,<sup>\*b,c</sup> Bo  
Zhang<sup>\*d</sup>

<sup>a</sup>Shannxi Key Laboratory of Catalysis, School of Chemistry and Environment  
Science, Shaanxi University of Technology, 1 Dongyihuan Road, Hanzhong  
723001, China.

<sup>b</sup>Jiangsu Co-Innovation Center of Efficient Processing and Utilization of Forest  
Resources, International Innovation Center for Forest Chemicals and  
Materials, College of Chemical Engineering, Nanjing Forestry University,  
Nanjing, 210037, China. Email: [xumin.cai@njfu.edu.cn](mailto:xumin.cai@njfu.edu.cn)

<sup>c</sup>Guangdong Provincial Key Laboratory of Luminescence from Molecular  
Aggregates, Guangzhou, 510640, China.

<sup>d</sup>CAS Key Laboratory of Science and Technology on Applied Catalysis, Dalian  
Institute of Chemical Physics, Chinese Academy of Sciences, Dalian 116023,  
China. E-mail: [bo.zhang@dicp.ac.cn](mailto:bo.zhang@dicp.ac.cn)

<sup>e</sup>Molecular Catalysis, Catalysis Research Center and Department of  
Chemistry, School of Natural Sciences, Technical University of Munich,  
Lichtenbergstr. 4, D-85748, Garching bei München.

<sup>#</sup>These authors contributed equally: Jianwei Ji, Chuangchi Ding, Shouji Li

## Table of Contents

|                                                   |   |
|---------------------------------------------------|---|
| 1. General.....                                   | 2 |
| 2. Experimental methods.....                      | 3 |
| 3. The photophysical property of carbazoles.....  | 4 |
| 4. Copies of NMR spectra and analytical data..... | 5 |

## 1. General

The chemicals were obtained commercially and used without further purification.  $^1\text{H}$  and  $^{13}\text{C}$  NMR spectra were recorded on a Bruker DRX-600 spectrometer and all chemical shift values refer to  $\delta_{\text{TMS}} = 0.00$  ppm or solvent peak. The HRMS analysis was obtained on a Waters GC-TOF CA156 mass spectrometer. Column chromatographic purifications were performed on SDZF silica gel 160. The carbazole derivatives were purified by column chromatography on silica gel (petroleum ether/ethyl acetate/dichloromethane, 25:1:5) to afford pure products. The UV-visible absorption spectra of all the compounds are collected with a Shimadzu UV2450 spectrometer. Liquid products were quantified using a high-performance liquid chromatograph (HPLC, Prominence-i LC2030) equipped with a UV-vis Detector ( $\lambda=280$  nm) and a C8 column (C8-3,  $5\mu\text{m}$   $4.6\times 150$  mm). A mixed solution composed of acetonitrile and  $\text{H}_2\text{O}$  with a ration of 80:20 (v/v) was used as a mobile phase and the flow rate was  $1.0\text{ mL min}^{-1}$ . Photoluminescence spectra are recorded on a Fluoromax-4 spectrofluorometer (Horiba) for different water fraction ( $f_w$ ).

## 2. Experimental methods

**The experimental procedure for the synthesis of carbazole derivatives:** lignin  $\beta$ -O-4 model compound (0.2 mmol), 1-methyl-1H-indole-3-carbaldehyde (0.1 mmol), NaOH (0.8 mmol) and 2 mL of toluene were added into the pressure tube with stirring at 110 °C for 2 h under air, and the reactions were paralleled in three groups. After the reaction, the reaction cooled to room temperature, and 126  $\mu$ L acetic acid was added into the reaction with stirring at room temperature for 30 min. Subsequently,  $\text{CuCl}_2 \cdot 2\text{H}_2\text{O}$  (20 mol%), TEMPO (0.2 mmol), and 3-chloro-1-phenylpropan-1-one (0.1 mmol) was added to reaction solution and stirred at 160 °C for 24 h. After cooling to room temperature,  $\text{CH}_2\text{Cl}_2$  (10 mL) and  $\text{H}_2\text{O}$  was added into the reaction and the solution was filtered. The collected filtrate was concentrated under reduced pressure. The resulting residue was purified by silica gel column chromatography (petroleum ether /EtOAc = 10:1) to afford carbazole products.

Table S1. Screening of reaction parameters.<sup>[a]</sup>

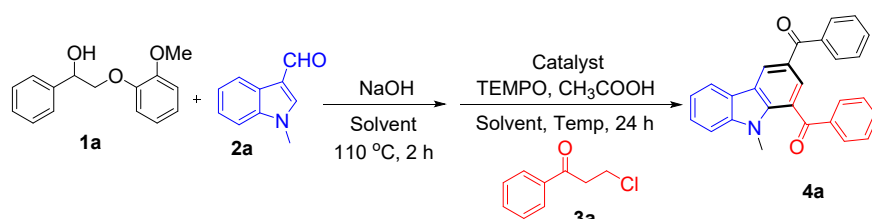

| Entry | Solvent | The ratio<br><b>1a:2a:3a</b> | <b>4a</b> Yield <sup>[b]</sup> |
|-------|---------|------------------------------|--------------------------------|
| 1     | Touene  | 1.5:1:1                      | 15                             |
| 2     | Toluene | 1:1:1                        | 14                             |
| 3     | Toluene | 2:1:1                        | 70                             |
| 4     | --      | 2:1:1                        | 1.8                            |

<sup>[a]</sup>Reaction conditions: lignin  $\beta$ -O-4 model compound **1** (0.x mmol), substrate **2a** (0.1 mmol), substrate **3a** (0.1 mmol), NaOH (0.8 mmol),  $\text{CuCl}_2 \cdot 2\text{H}_2\text{O}$  (20 mol%),  $\text{CH}_3\text{COOH}$  (126  $\mu$ L), TEMPO (0.2 mmol) in toluene (2 mL) at 160 °C; <sup>[b]</sup>the yields are determined by HPLC using external standard method.

### 3. The photophysical property of carbazoles

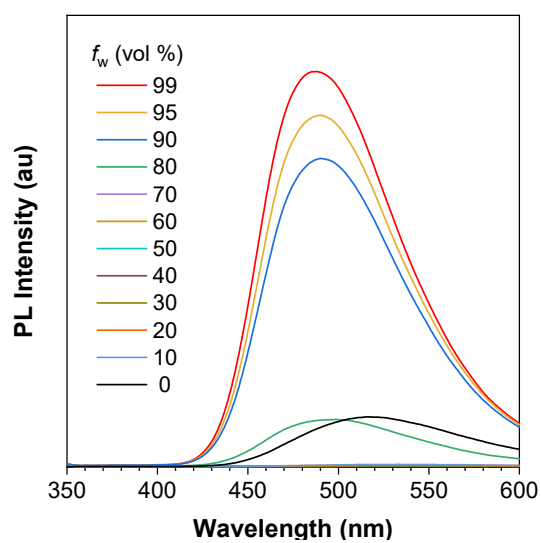

**Fig. S1.** PL spectra of **4j** in ACN/H<sub>2</sub>O mixtures with different  $f_w$ .  $\lambda_{\text{ex}}$ : 309 nm, concentration: 20  $\mu\text{M}$ .

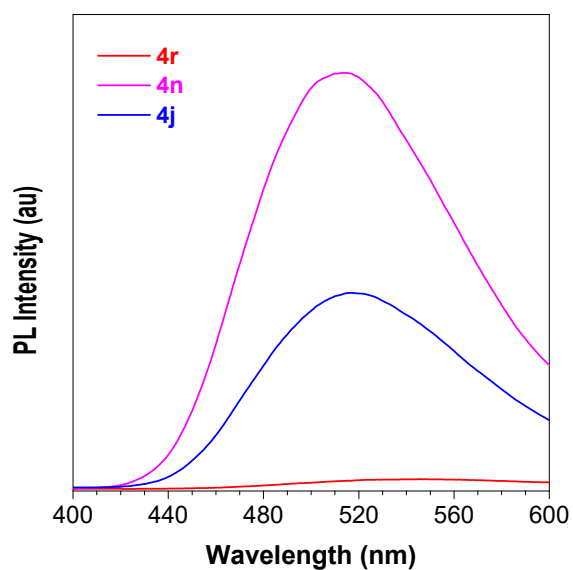

**Fig. S2.** PL spectra of **4r**, **4n**, and **4j** in pure acetonitrile (ACN) solution. Concentration: 20  $\mu\text{M}$ . (**4r**:  $\lambda_{\text{ex}}$ : 311 nm, **4n**:  $\lambda_{\text{ex}}$ : 304 nm, **4j**:  $\lambda_{\text{ex}}$ : 309 nm).

## 4. Copies of NMR spectra and analytical data

$^1\text{H}$  NMR(600 MHz,  $\text{CDCl}_3$ )

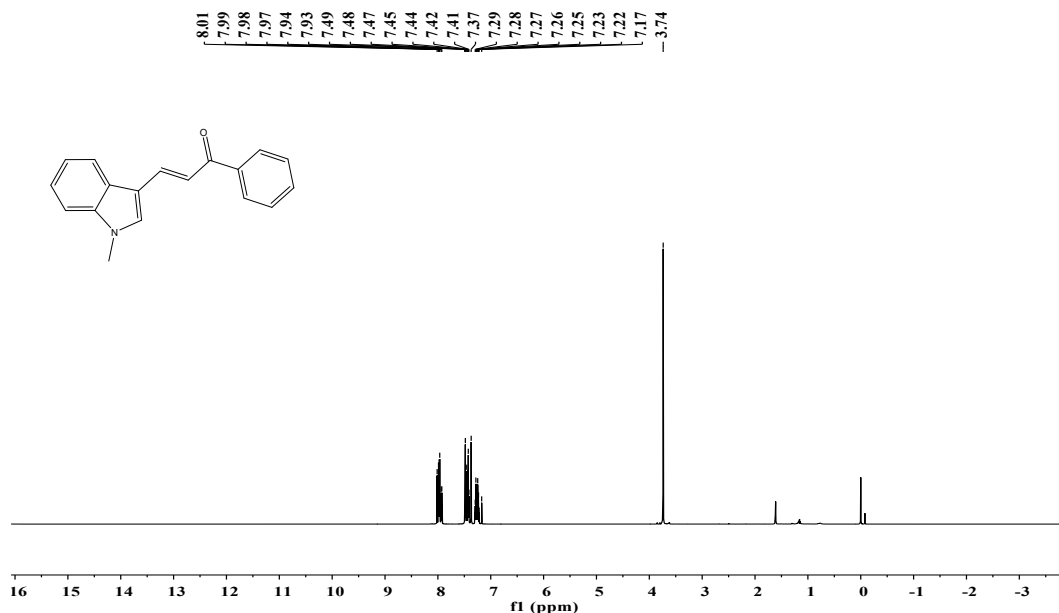

$^{13}\text{C}$  NMR(600 MHz,  $\text{CDCl}_3$ )

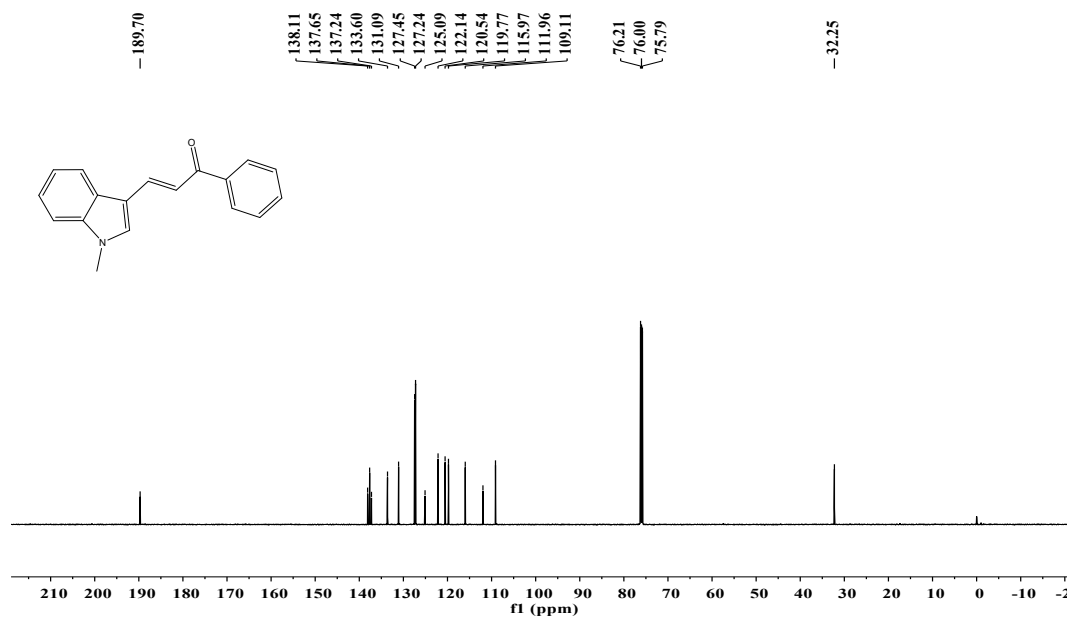

**(E)-3-(1-methyl-1H-indol-3-yl)-1-phenylprop-2-en-1-one (7):** yellow solid.  $^1\text{H}$  NMR (600 MHz, Chloroform-d)  $\delta$  8.03-7.95 (m, 3H), 7.93 (d,  $J = 7.1$  Hz, 1H), 7.54-7.40 (m, 4H), 7.37 (s, 1H), 7.31-7.20 (m, 3H), 3.74 (s, 3H).  $^{13}\text{C}$  NMR (600 MHz, Chloroform-d)  $\delta$  189.70(C=O), 138.11, 137.65, 137.24, 133.60, 131.09, 127.45, 127.24, 125.09, 122.14, 120.54, 119.77, 115.97, 111.96, 109.11, 32.25.

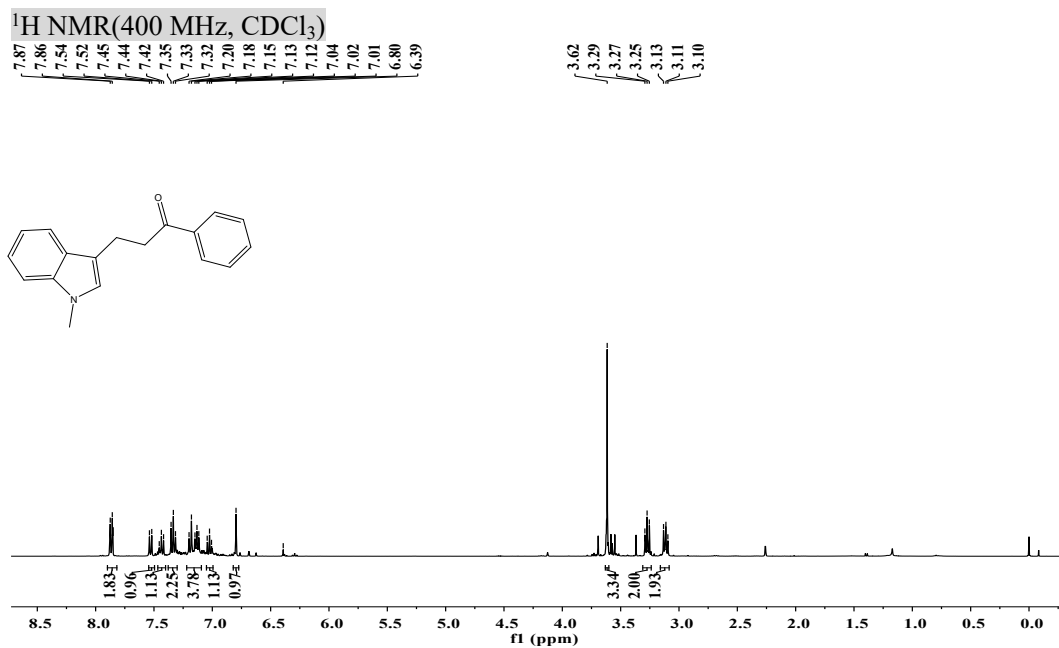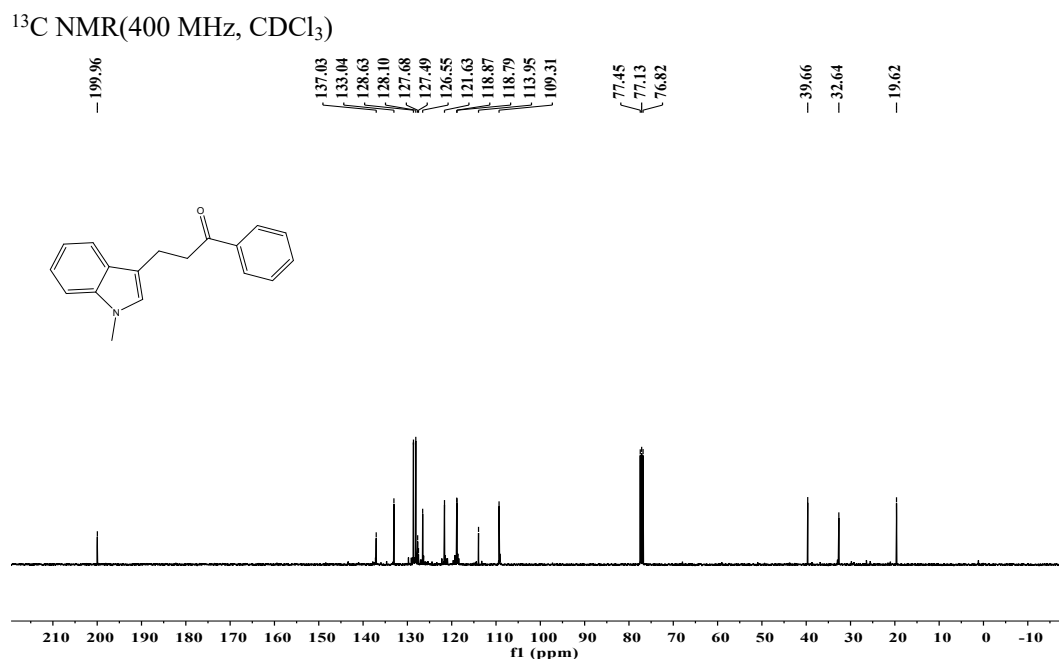

**3-(1-methyl-1H-indol-3-yl)-1-phenylpropan-1-one (8):** yellow liquid. <sup>1</sup>H NMR (400 MHz, Chloroform-d) δ 7.87 (d, J = 7.0 Hz, 2H), 7.53 (d, J = 7.9 Hz, 1H), 7.44 (t, J = 7.4 Hz, 1H), 7.33 (t, J = 7.5 Hz, 2H), 7.22 – 7.09 (m, 4H), 7.05 – 6.99 (m, 1H), 6.80 (s, 1H), 3.62 (s, 3H), 3.27 (t, J = 7.6 Hz, 2H), 3.16 – 3.08 (m, 2H). <sup>13</sup>C NMR (400 MHz, Chloroform-d) δ 199.96(C=O), 137.03, 133.04, 128.63, 128.10, 127.68, 127.49, 126.55, 121.63, 118.87, 118.79, 113.95, 109.31, 39.66, 32.64, 19.62.

<sup>1</sup>H NMR(600 MHz, CDCl<sub>3</sub>)

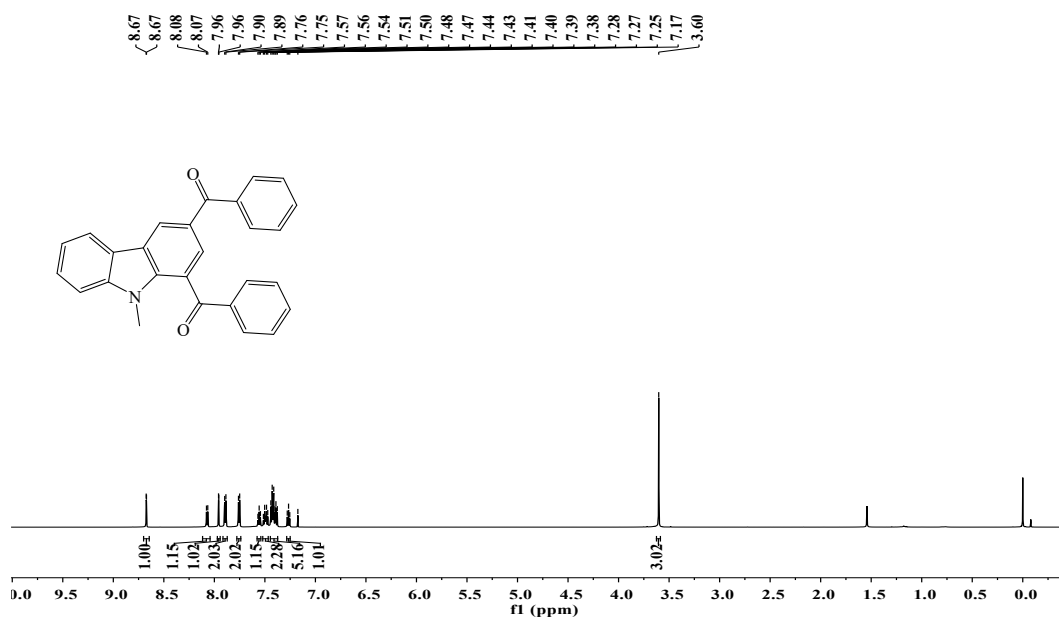

<sup>13</sup>C NMR(600 MHz, CDCl<sub>3</sub>)

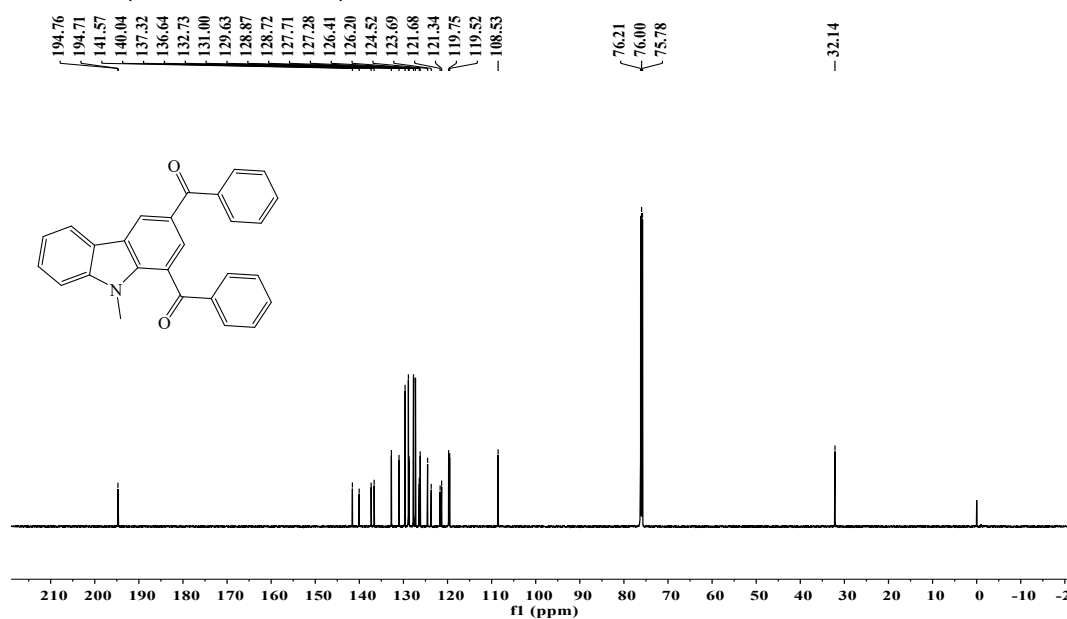

**(9-methyl-9H-carbazole-1,3-diyl)bis(phenylmethanone) (4a):** pale yellow solid. <sup>1</sup>H NMR (600 MHz, CDCl<sub>3</sub>) δ 8.67 (d, *J* = 1.6 Hz, 1H), 8.07 (d, *J* = 7.7 Hz, 1H), 7.96 (d, *J* = 1.6 Hz, 1H), 7.89 (d, *J* = 7.2 Hz, 2H), 7.76 (d, *J* = 7.0 Hz, 2H), 7.56 (t, *J* = 7.4 Hz, 1H), 7.52-7.47 (m, 2H), 7.45-7.37 (m, 5H), 7.27 (t, *J* = 7.5 Hz, 1H), 3.60 (s, 3H). <sup>13</sup>C NMR (600 MHz, CDCl<sub>3</sub>) δ 194.76, 194.71 (Cq each, C=O), 141.57, 140.04, 137.32, 136.64, 132.73, 131.00, 129.63, 128.87, 128.72, 127.71, 127.28, 126.41, 126.20, 124.52, 123.69, 121.68, 121.34, 119.75, 119.52, 108.53, 32.14.



<sup>1</sup>H NMR(600 MHz, CDCl<sub>3</sub>)

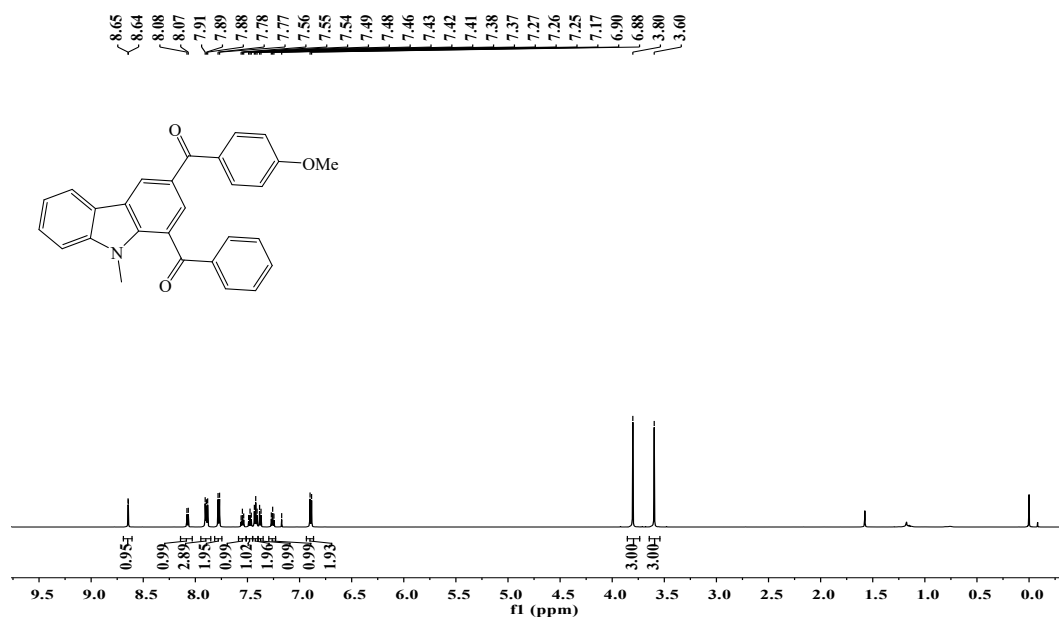

<sup>13</sup>C NMR(600 MHz, CDCl<sub>3</sub>)

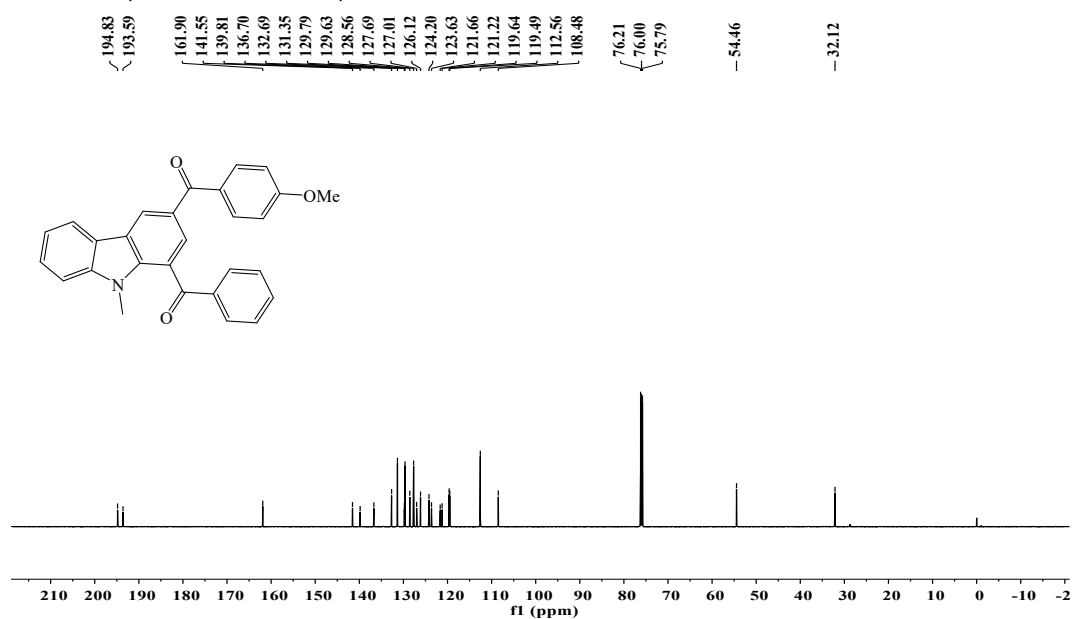

**(1-benzoyl-9-methyl-9H-carbazol-3-yl)(4-methoxyphenyl)methanone (4b):** yellow solid. <sup>1</sup>H NMR (600 MHz, Chloroform-*d*) δ 8.64 (d, *J* = 1.5 Hz, 1H), 8.07 (d, *J* = 7.7 Hz, 1H), 7.95-7.85 (m, 3H), 7.77 (d, *J* = 8.7 Hz, 2H), 7.55 (t, *J* = 7.4 Hz, 1H), 7.48 (t, *J* = 7.7 Hz, 1H), 7.42 (t, *J* = 7.8 Hz, 2H), 7.38 (d, *J* = 8.2 Hz, 1H), 7.26 (t, *J* = 7.4 Hz, 1H), 6.89 (d, *J* = 8.7 Hz, 2H), 3.80 (s, 3H), 3.60 (s, 3H). <sup>13</sup>C NMR (600 MHz, Chloroform-*d*) δ 194.83, 193.59 (Cq each, C=O), 161.90, 141.55, 139.81, 136.70, 132.69, 131.35, 129.79, 129.63, 128.56, 127.69, 127.01, 126.12, 124.20, 123.63, 121.66, 121.22, 119.64, 119.49, 112.56, 108.48, 54.46, 32.12.

<sup>1</sup>H NMR(600 MHz, CDCl<sub>3</sub>)

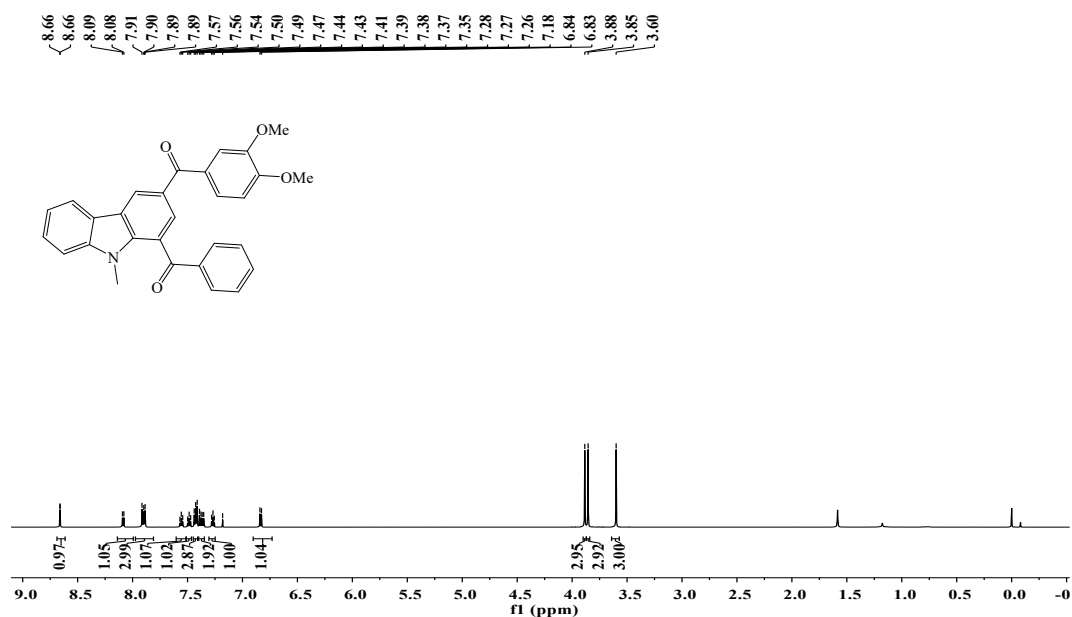

<sup>13</sup>C NMR(600 MHz, CDCl<sub>3</sub>)

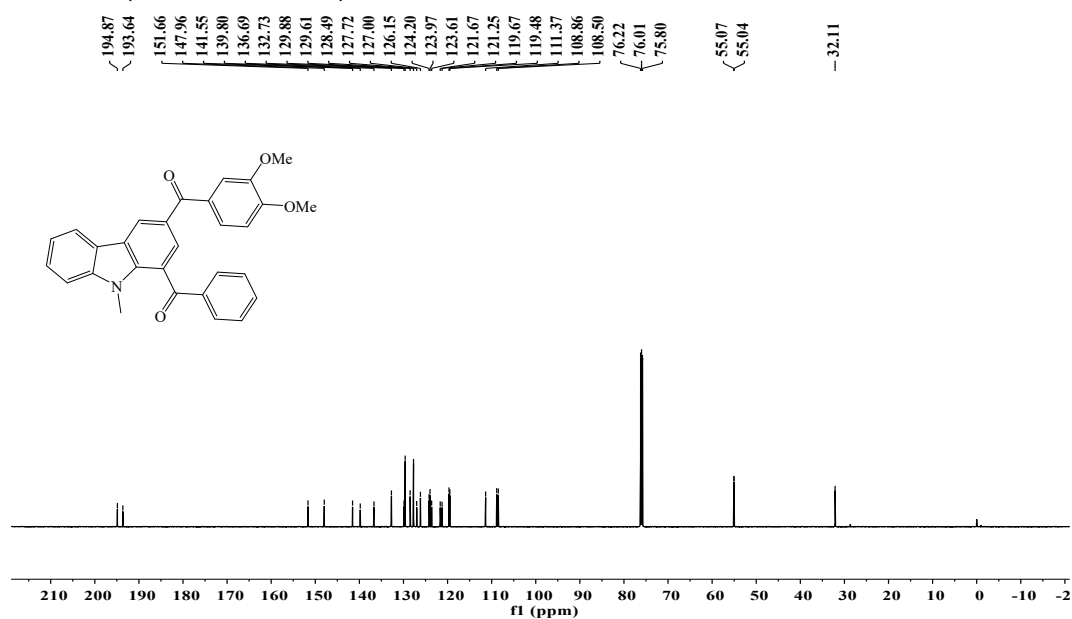

**(1-benzoyl-9-methyl-9H-carbazol-3-yl)(3,4-dimethoxyphenyl)methanone (4c):** white solid. <sup>1</sup>H NMR (600 MHz, Chloroform-*d*) δ 8.66 (d, *J* = 1.6 Hz, 1H), 8.09 (d, *J* = 7.7 Hz, 1H), 7.97-7.81 (m, 3H), 7.56 (t, *J* = 7.4 Hz, 1H), 7.49 (t, *J* = 8.1 Hz, 1H), 7.45-7.41 (m, 3H), 7.37 (dd, *J* = 14.8, 8.3 Hz, 2H), 7.27 (t, *J* = 7.4 Hz, 1H), 6.83 (d, *J* = 8.3 Hz, 1H), 3.88 and 3.85(s each, 3:3H), 3.60 (s, 3H). <sup>13</sup>C NMR (600 MHz, Chloroform-*d*) δ 194.87, 193.64 (Cq each, C=O), 151.66, 147.96, 141.55, 139.80, 136.69, 132.73, 129.88, 129.61, 128.49, 127.72, 127.00, 126.15, 124.20, 123.97, 123.61, 121.67, 121.25, 119.67, 119.48, 111.37, 108.86, 108.50, 55.07, 55.04, 32.11.

$^1\text{H}$  NMR(600 MHz,  $\text{CDCl}_3$ )

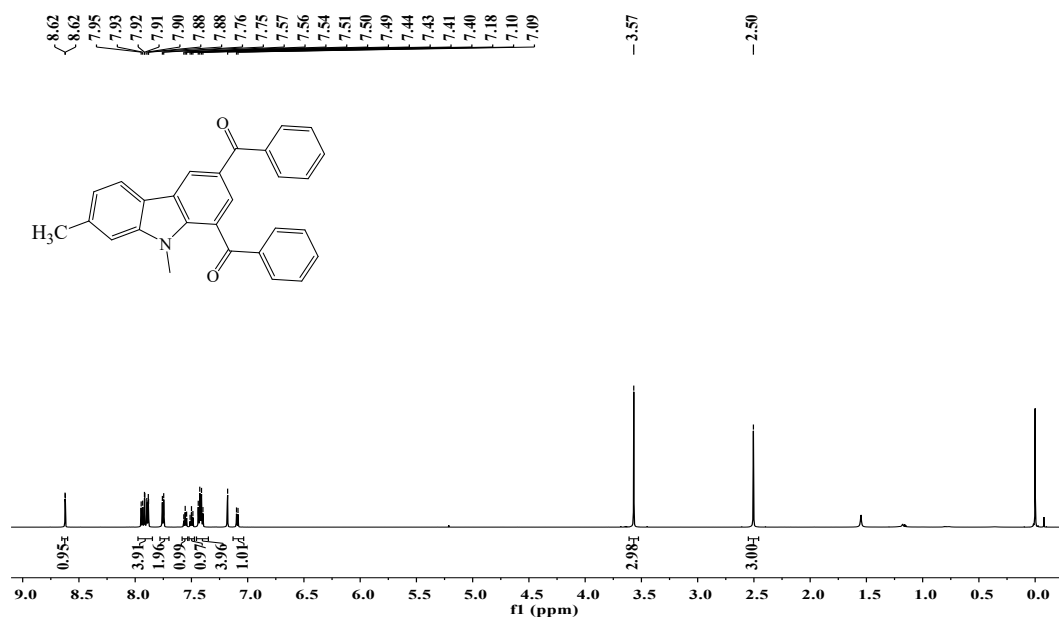

$^{13}\text{C}$  NMR(600 MHz,  $\text{CDCl}_3$ )

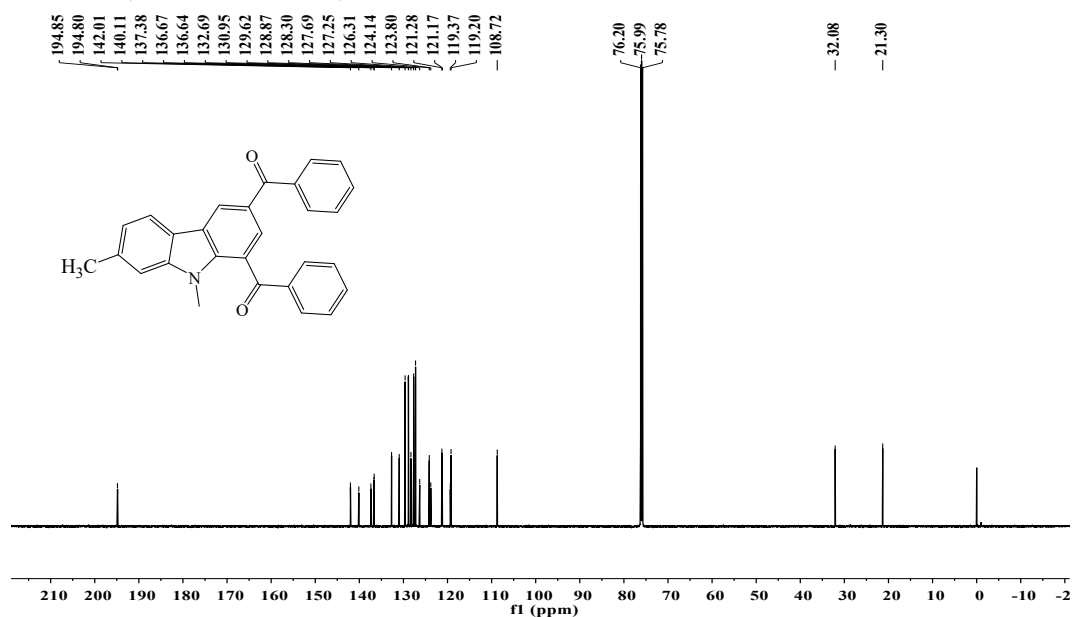

**(7,9-dimethyl-9H-carbazole-1,3-diyl)bis(phenylmethanone) (4d):** yellow solid.  $^1\text{H}$  NMR (600 MHz, Chloroform-d)  $\delta$  8.62 (d,  $J$  = 1.6 Hz, 1H), 7.98-7.85 (m, 4H), 7.75 (d,  $J$  = 7.0 Hz, 2H), 7.56 (t,  $J$  = 7.4 Hz, 1H), 7.50 (t,  $J$  = 7.4 Hz, 1H), 7.46-7.35 (m, 4H), 7.09 (d,  $J$  = 7.9 Hz, 1H), 3.57 (s, 3H), 2.50 (s, 3H).  $^{13}\text{C}$  NMR (600 MHz, Chloroform-d)  $\delta$  194.85, 194.80 (Cq each, C=O), 142.01, 140.11, 137.38, 136.67, 136.64, 132.69, 130.95, 129.62, 128.87, 128.30, 127.69, 127.25, 126.31, 124.14, 123.80, 121.28, 121.17, 119.37, 119.20, 108.72, 32.08, 21.30.

<sup>1</sup>H NMR(600 MHz, CDCl<sub>3</sub>)

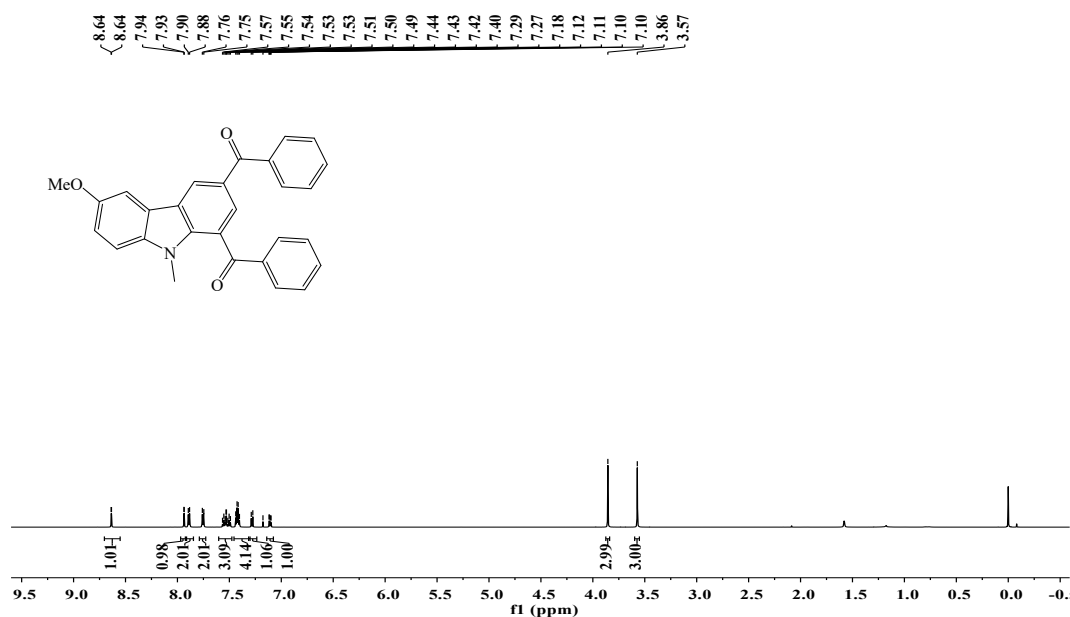

<sup>13</sup>C NMR(600 MHz, CDCl<sub>3</sub>)

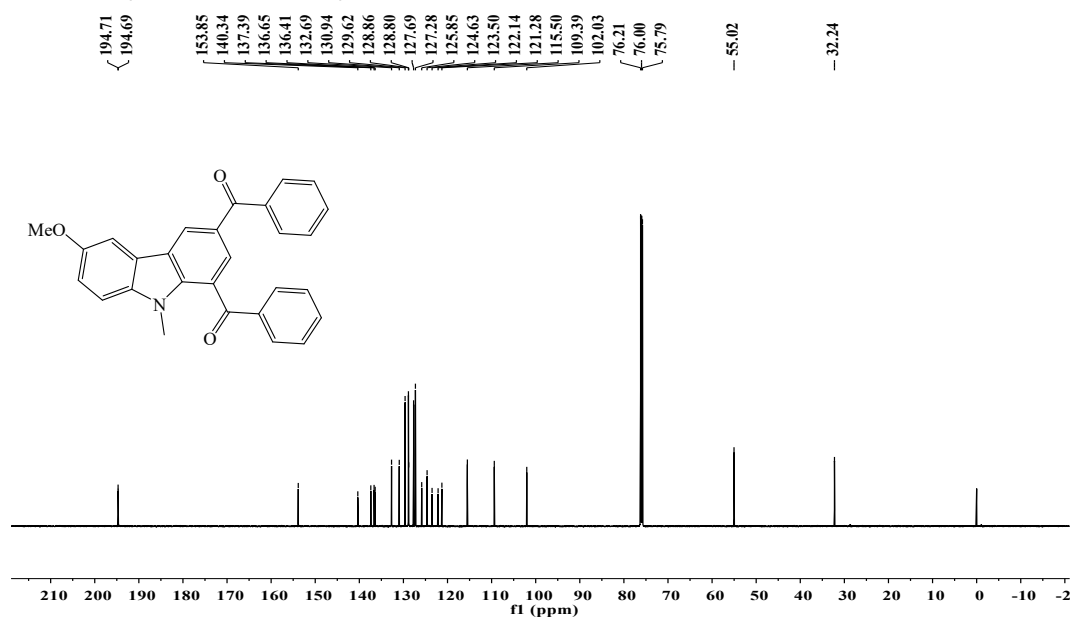

**(6-methoxy-9-methyl-9H-carbazole-1,3-diyl)bis(phenylmethanone) (4e):** yellow solid. <sup>1</sup>H NMR (600 MHz, Chloroform-*d*) δ 8.64 (d, *J* = 1.6 Hz, 1H), 7.94 (d, *J* = 1.6 Hz, 1H), 7.89 (d, *J* = 7.2 Hz, 2H), 7.75 (d, *J* = 8.3 Hz, 2H), 7.60-7.48 (m, 3H), 7.42 (q, *J* = 7.6 Hz, 4H), 7.28 (d, *J* = 8.9 Hz, 1H), 7.11 (dd, *J* = 8.8, 2.4 Hz, 1H), 3.86 (s, 3H), 3.57 (s, 3H). <sup>13</sup>C NMR (600 MHz, Chloroform-*d*) δ 194.71, 194.69 (Cq each, C=O), 153.85, 140.34, 137.39, 136.65, 136.41, 132.69, 130.94, 129.62, 128.86, 128.80, 127.69, 127.28, 125.85, 124.63, 123.50, 122.14, 121.28, 115.50, 109.39, 102.03, 55.02, 32.24.

<sup>1</sup>H NMR(600 MHz, CDCl<sub>3</sub>)

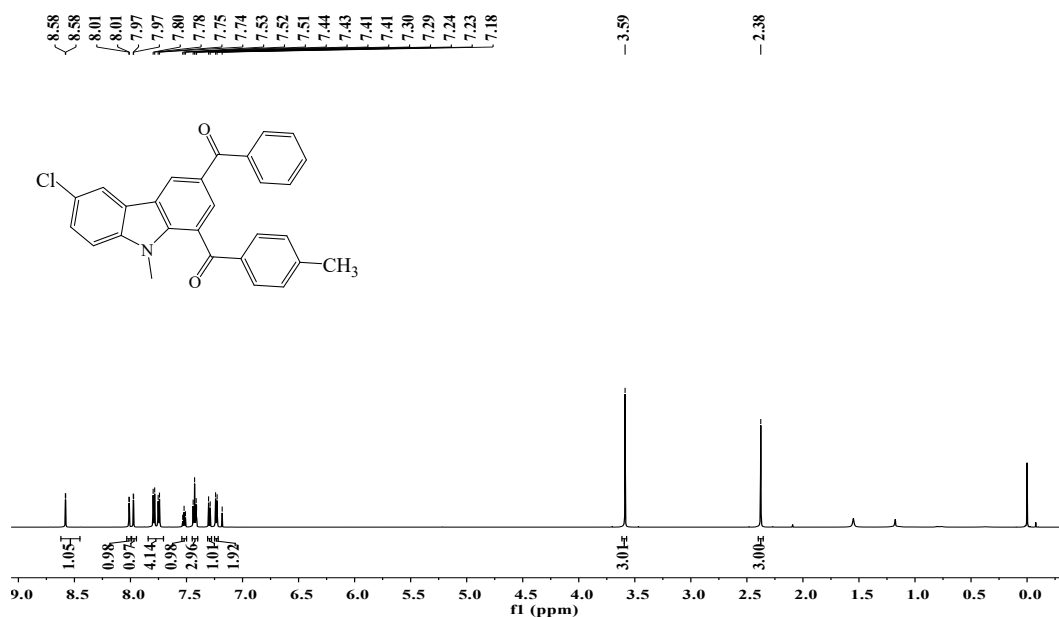

<sup>13</sup>C NMR(600 MHz, CDCl<sub>3</sub>)

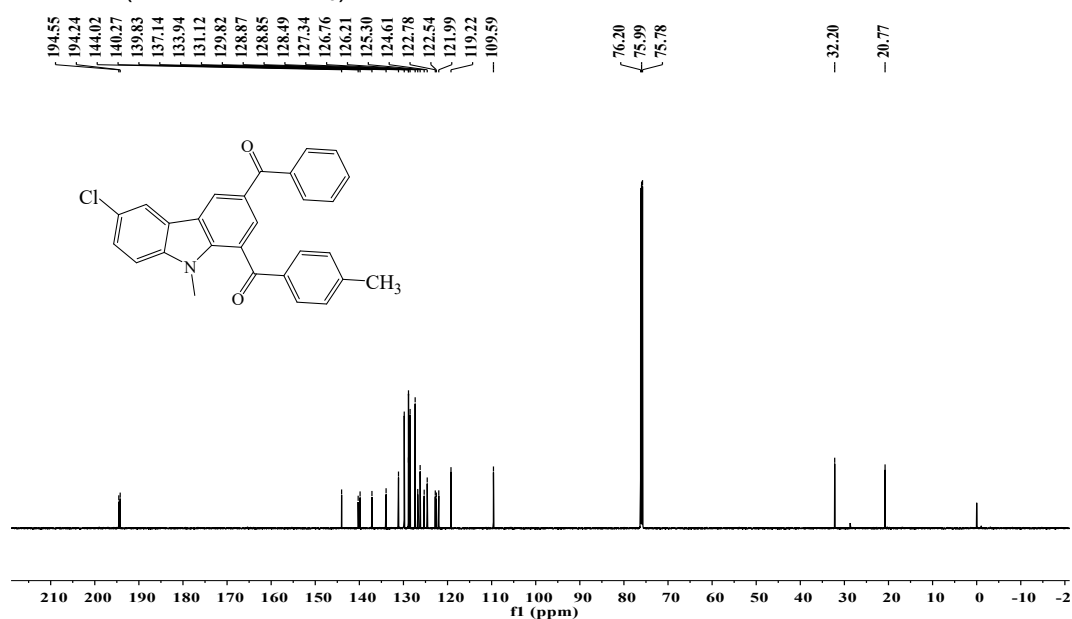

**(3-benzoyl-6-chloro-9-methyl-9H-carbazol-1-yl)(p-tolyl)methanone (4f):** yellow solid.  
<sup>1</sup>H NMR (600 MHz, Chloroform-*d*) δ 8.58 (d, *J* = 1.6 Hz, 1H), 8.01 (d, *J* = 2.0 Hz, 1H), 7.97 (d, *J* = 1.6 Hz, 1H), 7.77 (dd, *J* = 26.3, 7.6 Hz, 4H), 7.52 (t, *J* = 7.4 Hz, 1H), 7.45-7.40 (m, 3H), 7.30 (d, *J* = 8.7 Hz, 1H), 7.23 (d, *J* = 8.1 Hz, 2H), 3.59 (s, 3H), 2.38 (s, 3H).  
<sup>13</sup>C NMR (600 MHz, Chloroform-*d*) δ 194.55, 194.24 (Cq each, C=O), 144.02, 140.27, 139.83, 137.14, 133.94, 131.12, 129.82, 128.87, 128.85, 128.49, 127.34, 126.76, 126.21, 125.30, 124.61, 122.78, 122.54, 121.99, 119.22, 109.59, 32.20, 20.77.

$^1\text{H}$  NMR(600 MHz,  $\text{CDCl}_3$ )

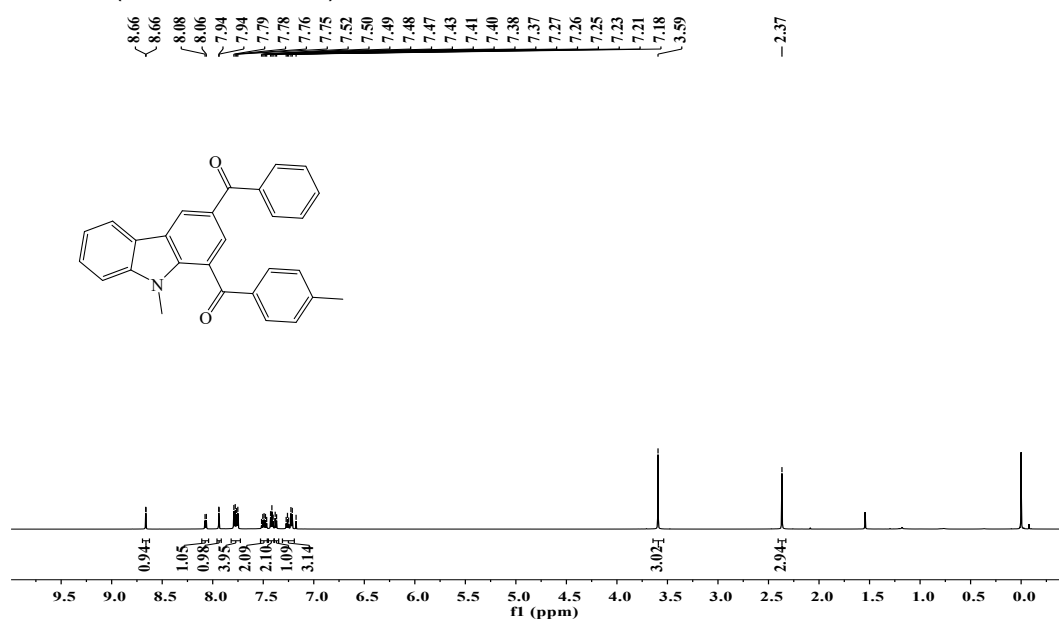

$^{13}\text{C}$  NMR(600 MHz,  $\text{CDCl}_3$ )

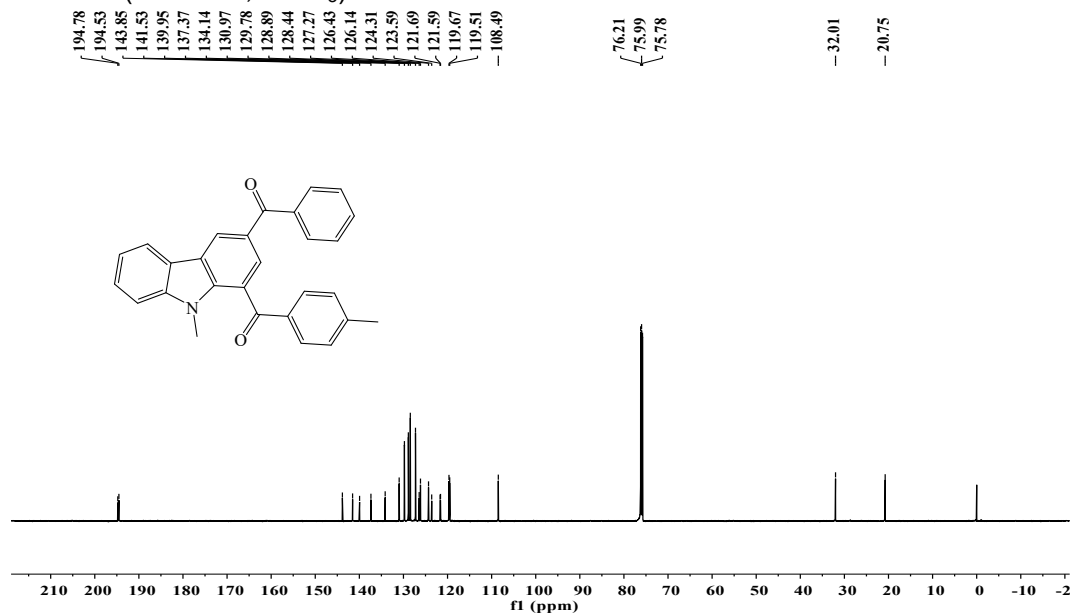

**(3-benzoyl-9-methyl-9H-carbazol-1-yl)(p-tolyl)methanone (4g):** yellow solid.  $^1\text{H}$  NMR (600 MHz, Chloroform-*d*)  $\delta$  8.66 (d,  $J$  = 1.6 Hz, 1H), 8.07 (d,  $J$  = 7.7 Hz, 1H), 7.94 (d,  $J$  = 1.6 Hz, 1H), 7.77 (dd,  $J$  = 16.0, 7.6 Hz, 4H), 7.49 (dt,  $J$  = 15.4, 7.3 Hz, 2H), 7.41 (t,  $J$  = 7.7 Hz, 2H), 7.37 (d,  $J$  = 8.2 Hz, 1H), 7.31-7.19 (m, 3H), 3.59 (s, 3H), 2.37 (s, 3H).  $^{13}\text{C}$  NMR (600 MHz, Chloroform-*d*)  $\delta$  194.78, 194.53 (Cq each, C=O), 143.85, 141.53, 139.95, 137.37, 134.14, 130.97, 129.78, 128.89, 128.44, 127.27, 126.43, 126.14, 124.31, 123.59, 121.69, 121.59, 119.67, 119.51, 108.49, 32.01, 20.75.

<sup>1</sup>H NMR(600 MHz, CDCl<sub>3</sub>)

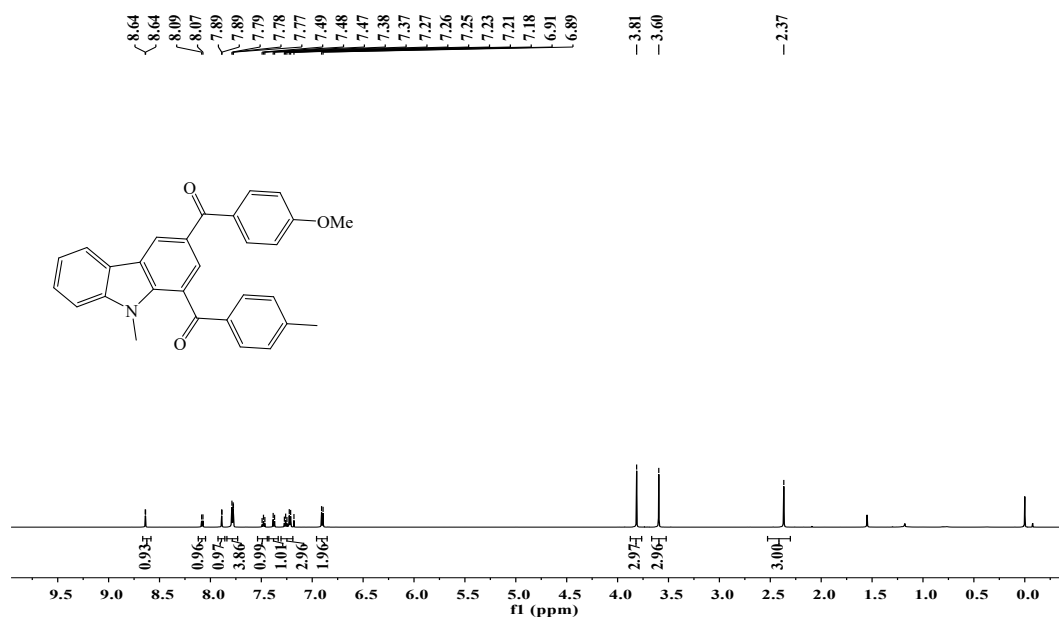

<sup>13</sup>C NMR(600 MHz, CDCl<sub>3</sub>)

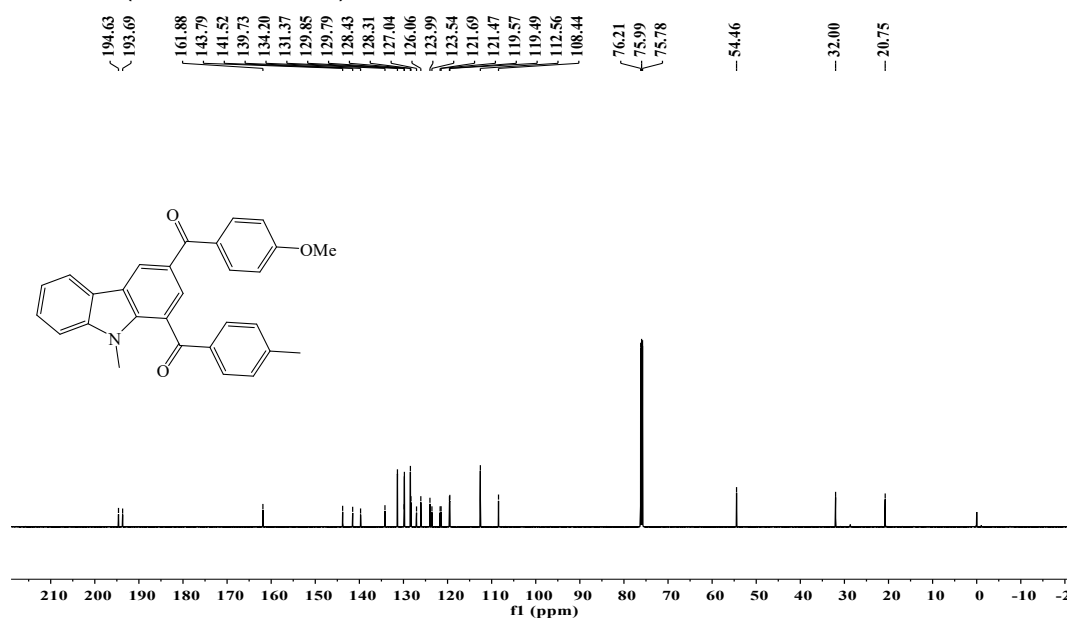

**(3-(4-methoxybenzoyl)-9-methyl-9H-carbazol-1-yl)(p-tolyl)methanone (4h):** yellow solid. <sup>1</sup>H NMR (600 MHz, Chloroform-*d*) δ 8.64 (d, *J* = 1.6 Hz, 1H), 8.08 (d, *J* = 7.7 Hz, 1H), 7.89 (d, *J* = 1.6 Hz, 1H), 7.84-7.73 (m, 4H), 7.48 (t, *J* = 8.1 Hz, 1H), 7.38 (d, *J* = 8.2 Hz, 1H), 7.31-7.19 (m, 3H), 6.90 (d, *J* = 8.8 Hz, 2H), 3.81 (s, 3H), 3.60 (s, 3H), 2.37 (s, 3H). <sup>13</sup>C NMR (600 MHz, Chloroform-*d*) δ 194.63, 193.69 (Cq each, C=O), 161.88, 143.79, 141.52, 139.73, 134.20, 131.37, 129.85, 129.79, 128.43, 128.31, 127.04, 126.06, 123.99, 123.54, 121.69, 121.47, 119.57, 119.49, 112.56, 108.44, 54.46, 32.00, 20.75.

$^1\text{H}$  NMR(600 MHz,  $\text{CDCl}_3$ )

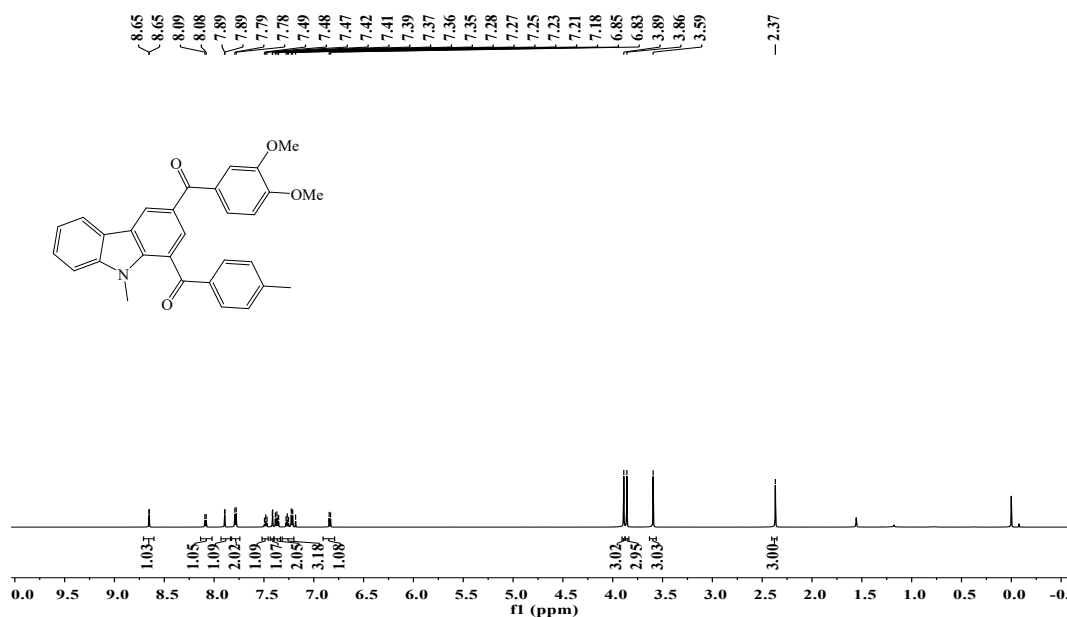

$^{13}\text{C}$  NMR(600 MHz,  $\text{CDCl}_3$ )

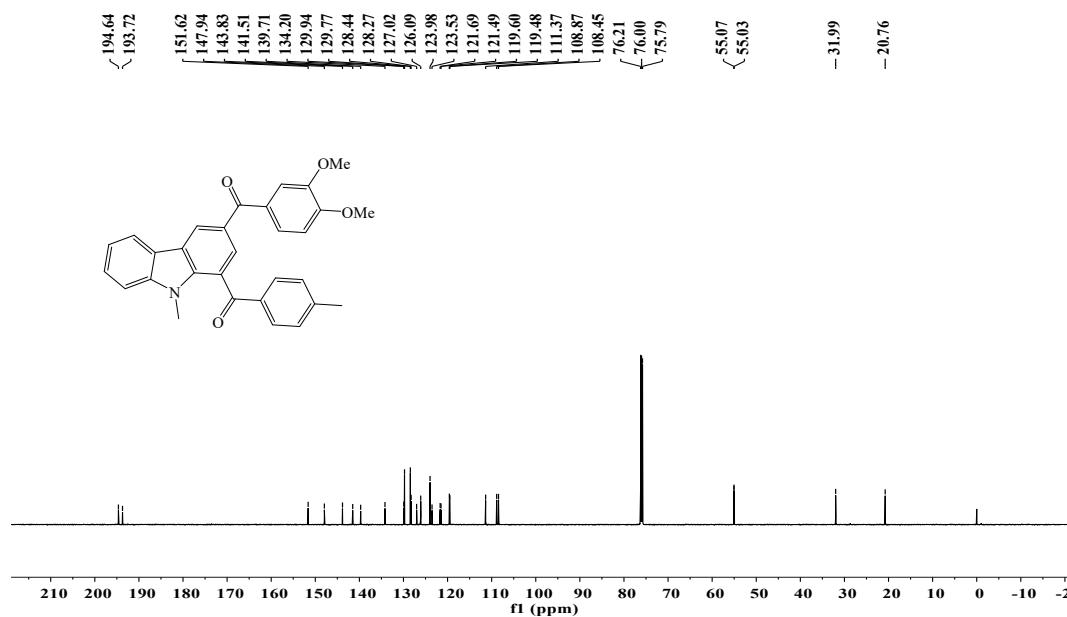

**(3-(3,4-dimethoxybenzoyl)-9-methyl-9H-carbazol-1-yl)(p-tolyl)methanone (4i):** white solid.  $^1\text{H}$  NMR (600 MHz, Chloroform-*d*)  $\delta$  8.65 (d,  $J$  = 1.7 Hz, 1H), 8.09 (d,  $J$  = 7.8 Hz, 1H), 7.89 (d,  $J$  = 1.7 Hz, 1H), 7.79 (d,  $J$  = 8.1 Hz, 2H), 7.48 (t,  $J$  = 7.6 Hz, 1H), 7.41 (d,  $J$  = 1.8 Hz, 1H), 7.40-7.33 (m, 2H), 7.32-7.20 (m, 3H), 6.84 (d,  $J$  = 8.3 Hz, 1H), 3.89 (s, 3H), 3.86 (s, 3H), 3.59 (s, 3H), 2.37 (s, 3H).  $^{13}\text{C}$  NMR (600 MHz, Chloroform-*d*)  $\delta$  194.64, 193.72 (Cq each, C=O), 151.62, 147.94, 143.83, 141.51, 139.71, 134.20, 129.94, 129.77, 128.44, 128.27, 127.02, 126.09, 123.98, 123.53, 121.69, 121.49, 119.60, 119.48, 111.37, 108.87, 108.45, 55.07, 55.03, 31.99, 20.76.



$^1\text{H}$  NMR(600 MHz,  $\text{CDCl}_3$ )

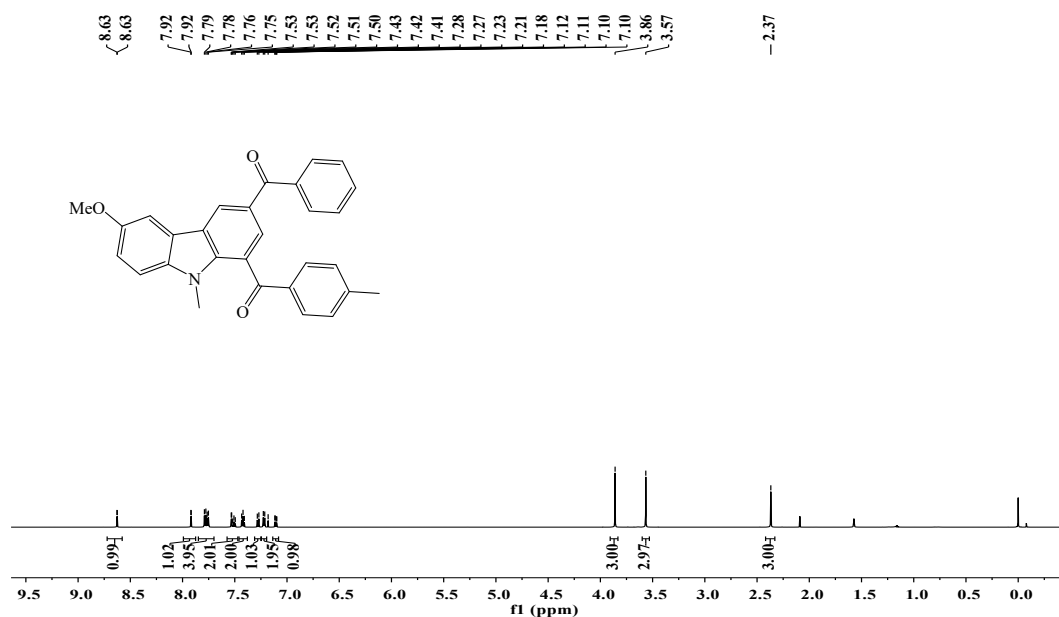

$^{13}\text{C}$  NMR(600 MHz,  $\text{CDCl}_3$ )

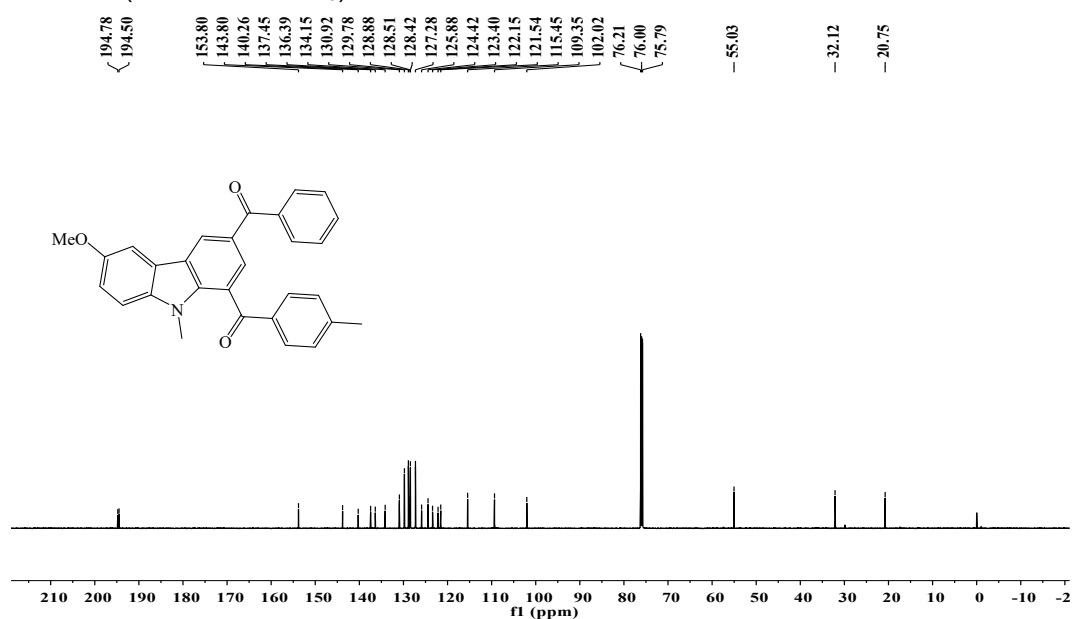

**(3-benzoyl-6-methoxy-9-methyl-9H-carbazol-1-yl)(p-tolyl)methanone (4j):** yellow solid.  $^1\text{H}$  NMR (600 MHz, Chloroform-*d*)  $\delta$  8.63 (d,  $J$  = 1.7 Hz, 1H), 7.92 (d,  $J$  = 1.7 Hz, 1H), 7.77 (dd,  $J$  = 15.3, 7.6 Hz, 4H), 7.57-7.47 (m, 2H), 7.42 (t,  $J$  = 7.7 Hz, 2H), 7.28 (d,  $J$  = 8.9 Hz, 1H), 7.22 (d,  $J$  = 8.0 Hz, 2H), 7.11 (dd,  $J$  = 8.8, 2.5 Hz, 1H), 3.86 (s, 3H), 3.57 (s, 3H), 2.37 (s, 3H).  $^{13}\text{C}$  NMR (600 MHz, Chloroform-*d*)  $\delta$  194.78, 194.50 (Cq each, C=O), 153.80, 143.80, 140.26, 137.45, 136.39, 134.15, 130.92, 129.78, 128.88, 128.51, 128.42, 127.28, 125.88, 124.42, 123.40, 122.15, 121.54, 115.45, 109.35, 102.02, 55.03, 32.12, 20.75.

$^1\text{H}$  NMR(600 MHz,  $\text{CDCl}_3$ )

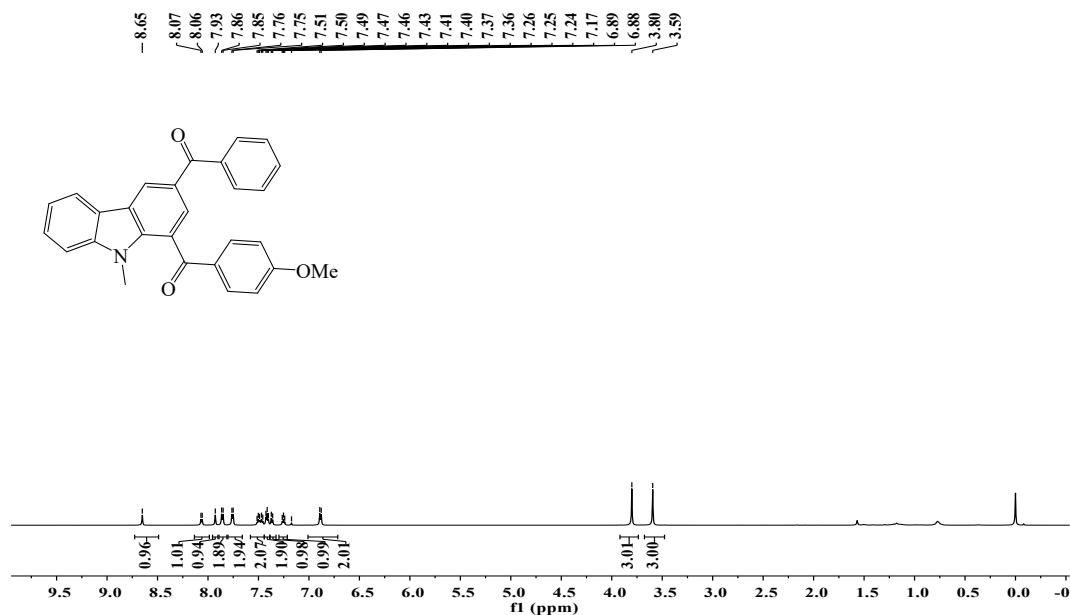

$^{13}\text{C}$  NMR(600 MHz,  $\text{CDCl}_3$ )

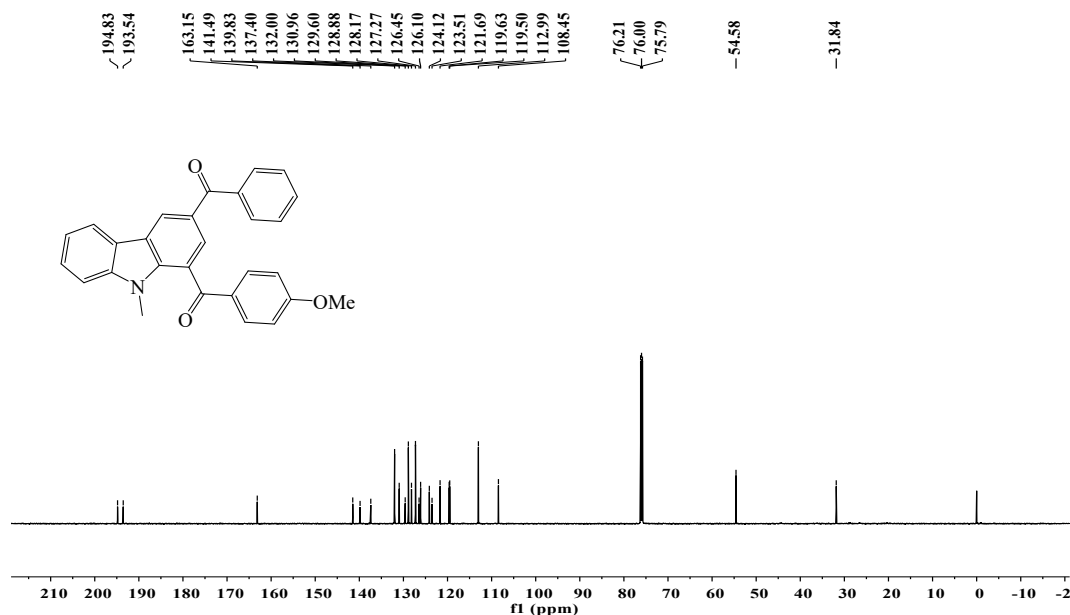

**(3-benzoyl-9-methyl-9H-carbazol-1-yl)(4-methoxyphenyl)methanone (4k):** yellow solid.  $^1\text{H}$  NMR (600 MHz, Chloroform-*d*)  $\delta$  8.65 (s, 1H), 8.06 (d,  $J$  = 7.6 Hz, 1H), 7.93 (s, 1H), 7.86 (d,  $J$  = 8.5 Hz, 2H), 7.76 (d,  $J$  = 7.4 Hz, 2H), 7.58-7.44 (m, 2H), 7.41 (t,  $J$  = 7.4 Hz, 2H), 7.37 (d,  $J$  = 8.1 Hz, 1H), 7.25 (t,  $J$  = 7.4 Hz, 1H), 6.89 (d,  $J$  = 8.5 Hz, 2H), 3.80 (s, 3H), 3.59 (s, 3H).  $^{13}\text{C}$  NMR (600 MHz, Chloroform-*d*)  $\delta$  194.83, 193.54 (Cq each, C=O), 163.15, 141.49, 139.83, 137.40, 132.00, 130.96, 129.60, 128.88, 128.17, 127.27, 126.45, 126.10, 124.12, 123.51, 121.69, 119.63, 119.50, 112.99, 108.45, 54.58, 31.84.

$^1\text{H}$  NMR(600 MHz,  $\text{CDCl}_3$ )

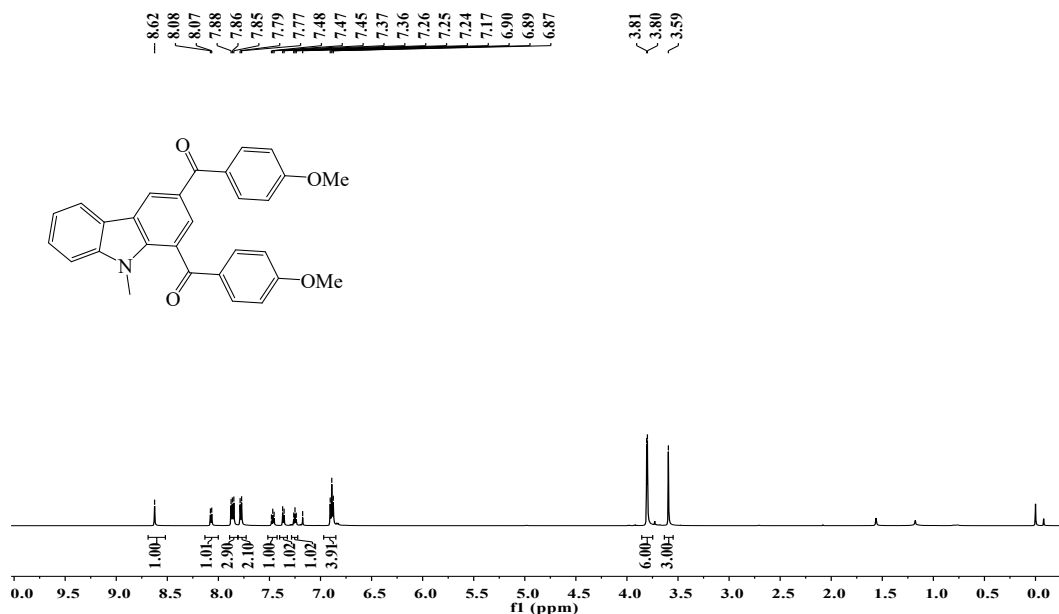

$^{13}\text{C}$  NMR(600 MHz,  $\text{CDCl}_3$ )

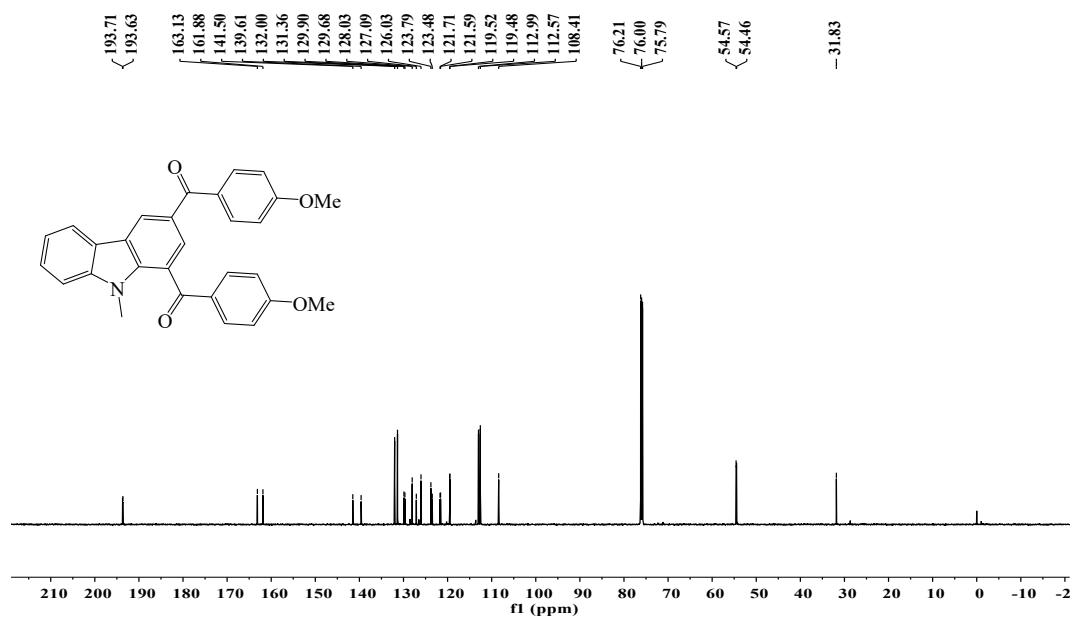

**(9-methyl-9H-carbazole-1,3-diyl)bis((4-methoxyphenyl)methanone) (4l):** yellow solid.  $^1\text{H}$  NMR (600 MHz, Chloroform- $d$ )  $\delta$  8.62 (s, 1H), 8.07 (d,  $J = 7.7$  Hz, 1H), 7.89 – 7.81 (m, 3H), 7.78 (d,  $J = 8.6$  Hz, 2H), 7.47 (t,  $J = 7.6$  Hz, 1H), 7.36 (d,  $J = 8.2$  Hz, 1H), 7.25 (t,  $J = 7.4$  Hz, 1H), 6.89 (t,  $J = 9.0$  Hz, 4H), 3.81 and 3.80 (s each, 3H), 3.59 (s, 3H).  $^{13}\text{C}$  NMR (600 MHz, Chloroform- $d$ )  $\delta$  193.71, 193.63 (Cq each, C=O), 163.13, 161.88, 141.50, 139.61, 132.00, 131.36, 129.90, 129.68, 128.03, 127.09, 126.03, 123.79, 123.48, 121.71, 121.59, 119.52, 119.48, 112.99, 112.57, 108.41, 54.57, 54.46, 31.83.

<sup>1</sup>H NMR(600 MHz, CDCl<sub>3</sub>)

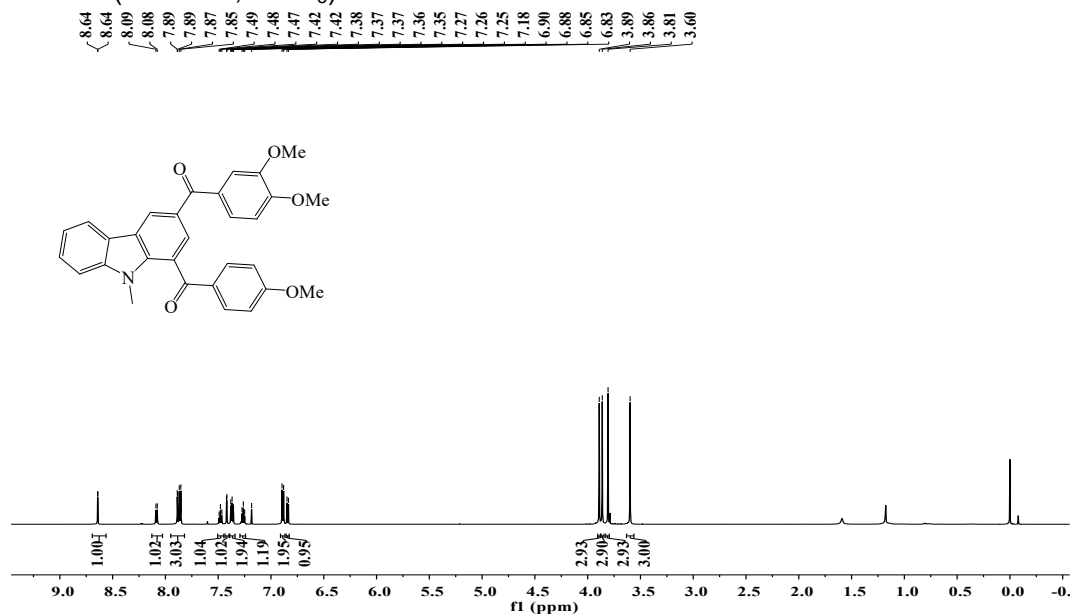

<sup>13</sup>C NMR(600 MHz, CDCl<sub>3</sub>)

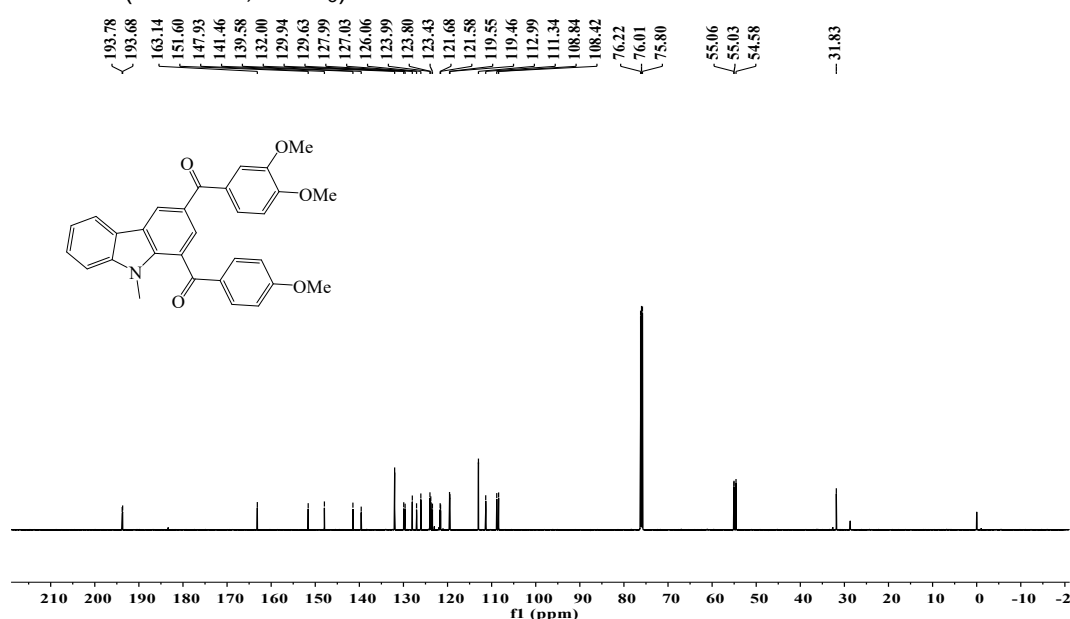

**(3-(3,4-dimethoxybenzoyl)-9-methyl-9H-carbazol-1-yl)(4-methoxyphenyl)methanone (4m):** white solid. <sup>1</sup>H NMR (600 MHz, Chloroform-*d*)  $\delta$  8.64 (d,  $J$  = 1.6 Hz, 1H), 8.08 (d,  $J$  = 7.7 Hz, 1H), 7.95-7.82 (m, 3H), 7.48 (t,  $J$  = 7.7 Hz, 1H), 7.42 (d,  $J$  = 1.9 Hz, 1H), 7.39-7.34 (m, 2H), 7.26 (t,  $J$  = 7.5 Hz, 1H), 6.89 (d,  $J$  = 8.9 Hz, 2H), 6.84 (d,  $J$  = 8.3 Hz, 1H), 3.89 (s, 3H), 3.86 (s, 3H), 3.81 (s, 3H), 3.60 (s, 3H). <sup>13</sup>C NMR (600 MHz, Chloroform-*d*)  $\delta$  193.78, 193.68 (Cq each, C=O), 163.14, 151.60, 147.93, 141.46, 139.58, 132.00, 129.94, 129.63, 127.99, 127.03, 126.06, 123.99, 123.80, 123.43, 121.68, 121.58, 119.55, 119.46, 112.99, 111.34, 108.84, 108.42, 55.06, 55.03, 54.58, 31.83.

<sup>1</sup>H NMR(600 MHz, CDCl<sub>3</sub>)

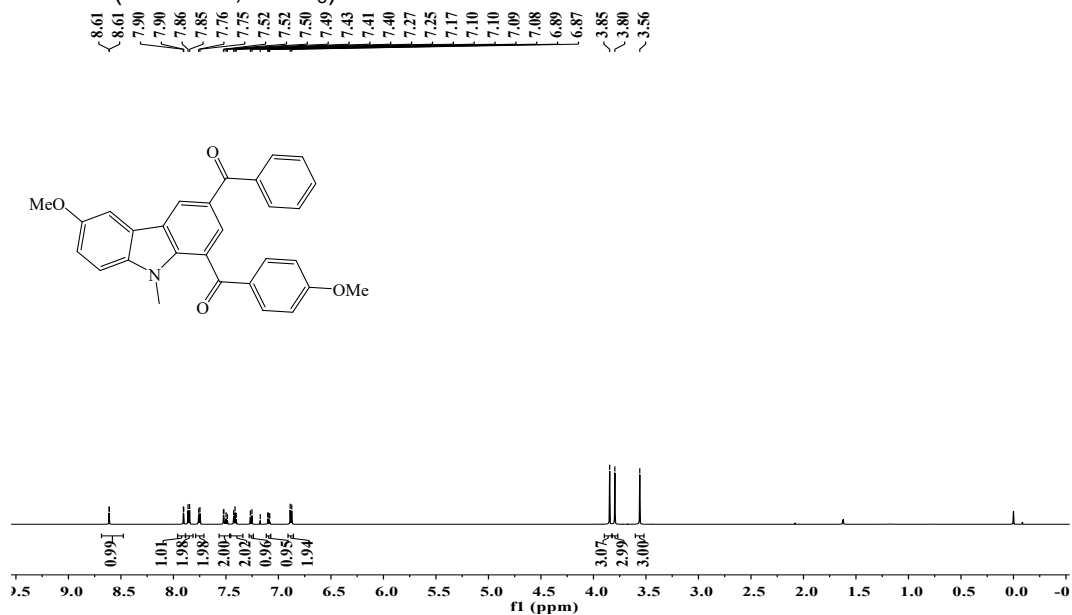

<sup>13</sup>C NMR(600 MHz, CDCl<sub>3</sub>)

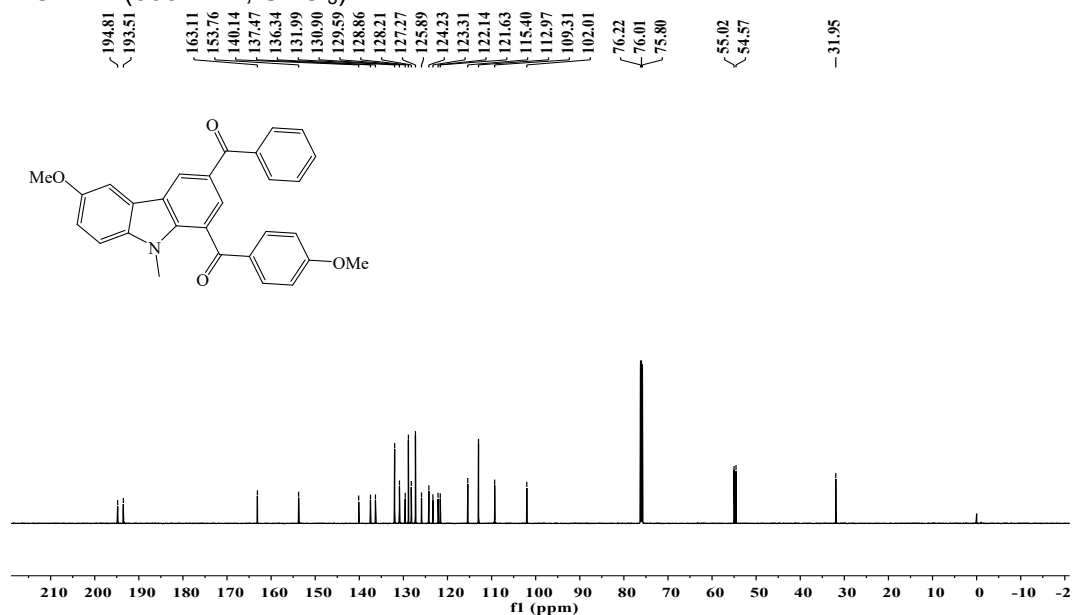

**(3-benzoyl-6-methoxy-9-methyl-9H-carbazol-1-yl)(4-methoxyphenyl)methanone(4n):**

yellow solid. <sup>1</sup>H NMR (600 MHz, Chloroform-*d*)  $\delta$  8.61 (d,  $J$  = 1.7 Hz, 1H), 7.90 (d,  $J$  = 1.6 Hz, 1H), 7.85 (d,  $J$  = 8.9 Hz, 2H), 7.75 (d,  $J$  = 7.0 Hz, 2H), 7.56-7.46 (m, 2H), 7.41 (t,  $J$  = 7.6 Hz, 2H), 7.26 (d,  $J$  = 8.9 Hz, 1H), 7.09 (dd,  $J$  = 8.8, 2.5 Hz, 1H), 6.88 (d,  $J$  = 8.9 Hz, 2H), 3.85 (s, 3H), 3.80 (s, 3H), 3.56 (s, 3H). <sup>13</sup>C NMR (600 MHz, Chloroform-*d*)  $\delta$  194.81, 193.51, 163.11, 153.76, 140.14, 137.47, 136.34, 131.99, 130.90, 129.59, 128.86, 128.21, 127.27, 125.89, 124.23, 123.31, 122.14, 121.63, 115.40, 112.97, 109.31, 102.01, 55.02, 54.57, 31.95.

<sup>1</sup>H NMR(600 MHz, CDCl<sub>3</sub>)

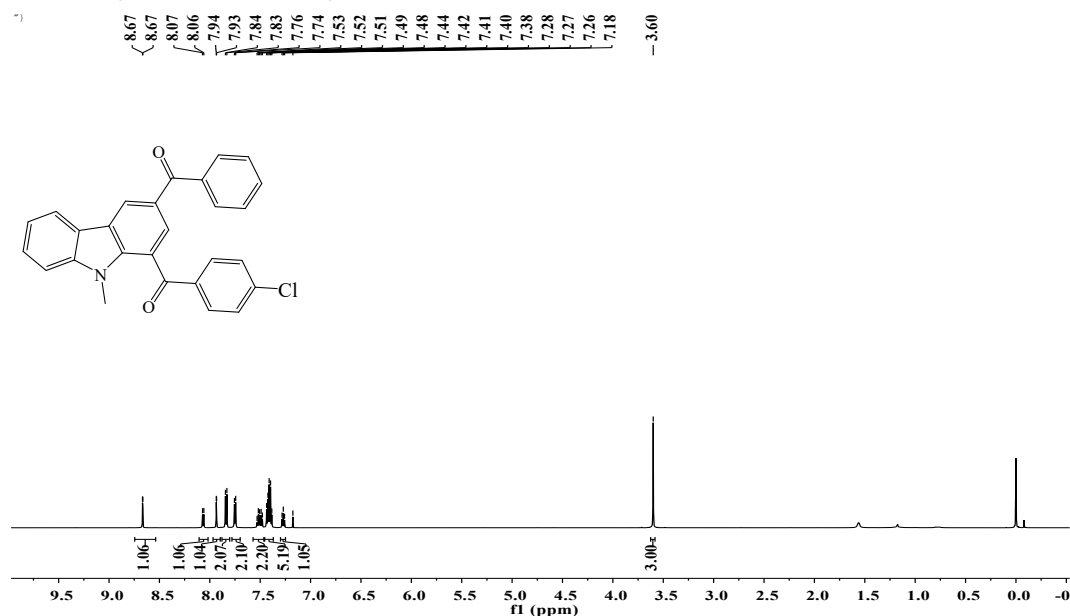

<sup>13</sup>C NMR(600 MHz, CDCl<sub>3</sub>)

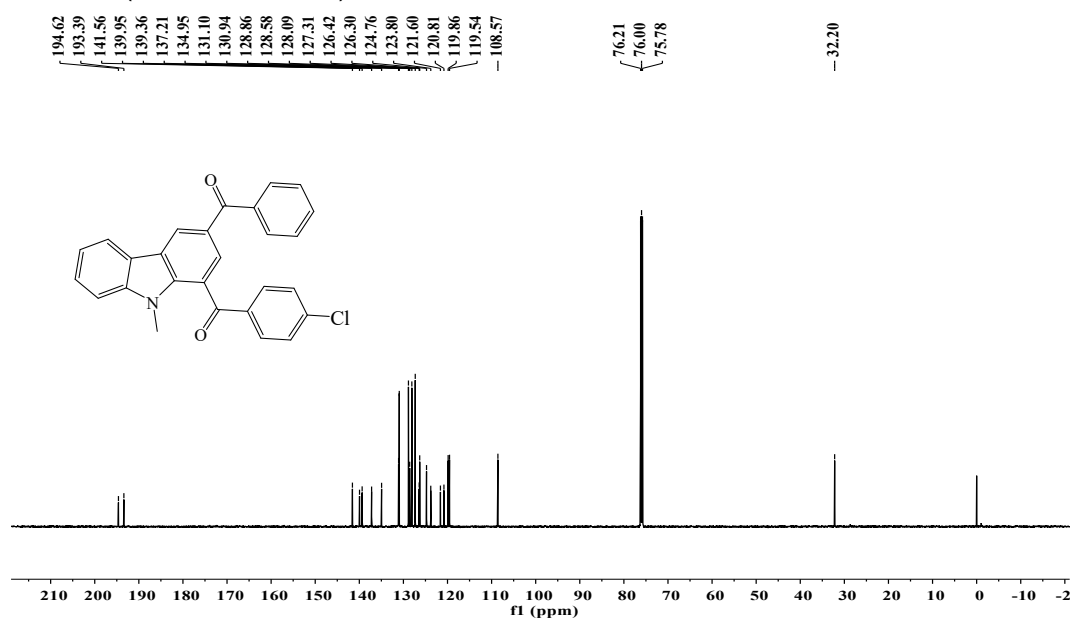

**(3-benzoyl-9-methyl-9H-carbazol-1-yl)(4-chlorophenyl)methanone (4o):** yellow solid. <sup>1</sup>H NMR (600 MHz, Chloroform-*d*)  $\delta$  8.67 (d,  $J$  = 1.6 Hz, 1H), 8.07 (d,  $J$  = 7.7 Hz, 1H), 7.93 (d,  $J$  = 1.6 Hz, 1H), 7.84 (d,  $J$  = 8.5 Hz, 2H), 7.75 (d,  $J$  = 7.1 Hz, 2H), 7.50 (dt,  $J$  = 16.2, 7.4 Hz, 2H), 7.41 (dt,  $J$  = 15.8, 7.6 Hz, 5H), 7.27 (t,  $J$  = 7.5 Hz, 1H), 3.60 (s, 3H). <sup>13</sup>C NMR (600 MHz, Chloroform-*d*)  $\delta$  194.62, 193.39 (Cq each, C=O), 141.56, 139.95, 139.36, 137.21, 134.95, 131.10, 130.94, 128.86, 128.58, 128.09, 127.31, 126.42, 126.30, 124.76, 123.80, 121.60, 120.81, 119.86, 119.54, 108.57, 32.20.

<sup>1</sup>H NMR(600 MHz, CDCl<sub>3</sub>)

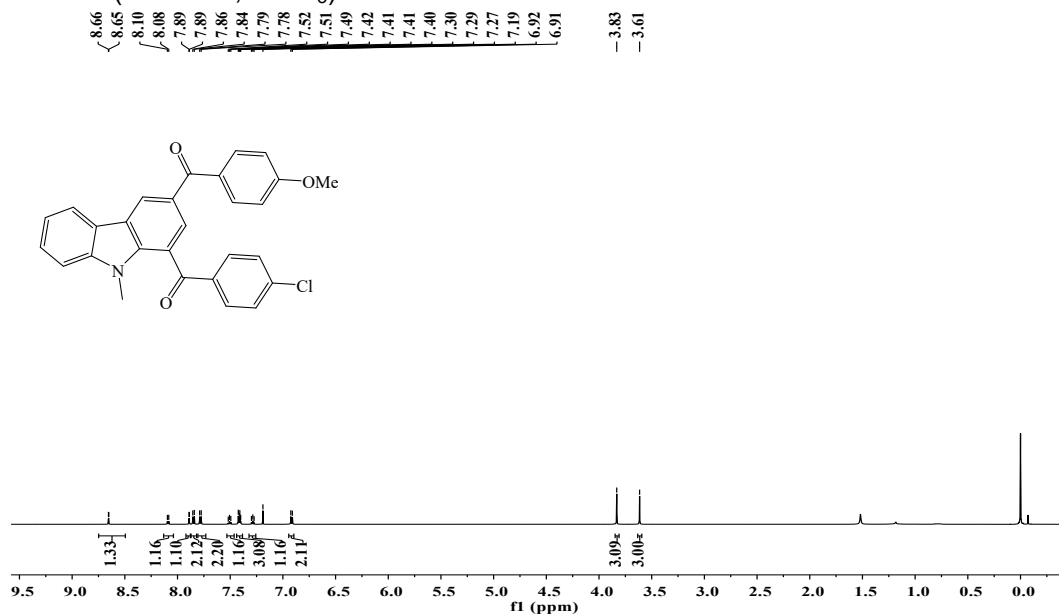

<sup>13</sup>C NMR(600 MHz, CDCl<sub>3</sub>)

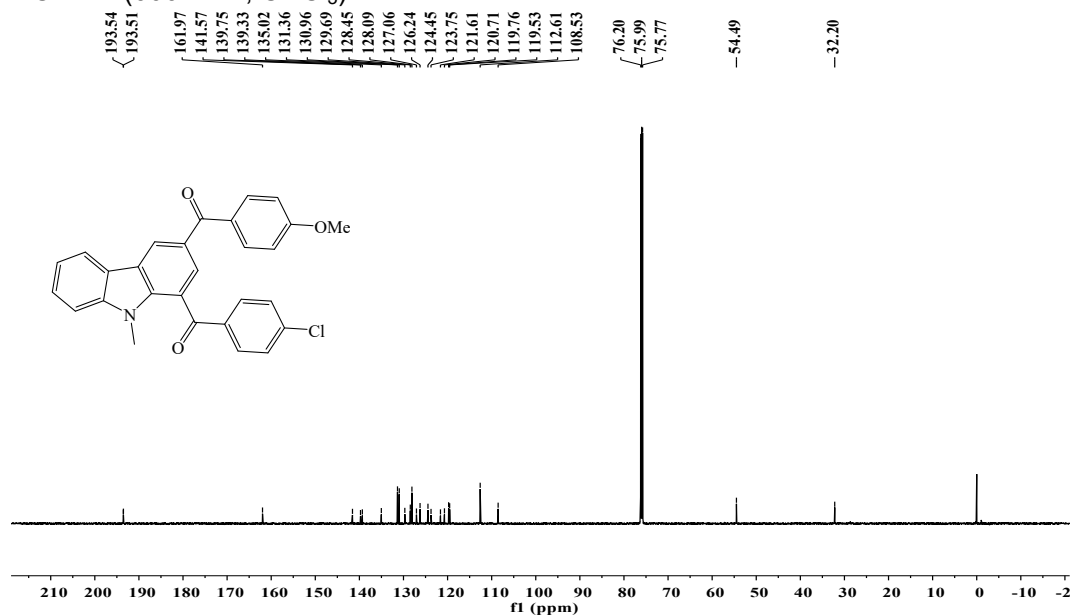

**(1-(4-chlorobenzoyl)-9-methyl-9H-carbazol-3-yl)(4-methoxyphenyl)methanone (4p):** yellow solid. <sup>1</sup>H NMR (600 MHz, Chloroform-*d*)  $\delta$  8.65 (d,  $J$  = 1.6 Hz, 1H), 8.09 (d,  $J$  = 7.7 Hz, 1H), 7.89 (d,  $J$  = 1.6 Hz, 1H), 7.85 (d,  $J$  = 8.6 Hz, 2H), 7.78 (d,  $J$  = 8.8 Hz, 2H), 7.51 (t,  $J$  = 7.2 Hz, 1H), 7.41 (dd,  $J$  = 8.4, 5.1 Hz, 3H), 7.29 (t,  $J$  = 7.4 Hz, 1H), 6.92 (d,  $J$  = 8.8 Hz, 2H), 3.83 (s, 3H), 3.61 (s, 3H). <sup>13</sup>C NMR (600 MHz, Chloroform-*d*)  $\delta$  193.54, 193.51 (Cq each, C=O), 161.97, 141.57, 139.75, 139.33, 135.02, 131.36, 130.96, 129.69, 128.45, 128.09, 127.06, 126.24, 124.45, 123.75, 121.61, 120.71, 119.76, 119.53, 112.61, 108.53, 54.49, 32.20.

<sup>1</sup>H NMR(600 MHz, CDCl<sub>3</sub>)

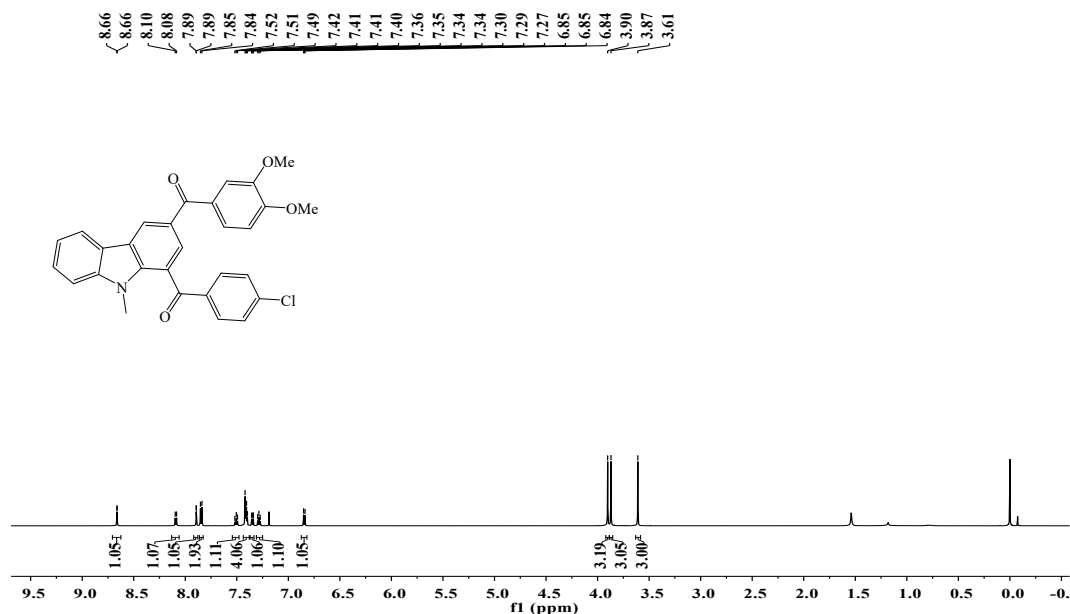

<sup>13</sup>C NMR(600 MHz, CDCl<sub>3</sub>)

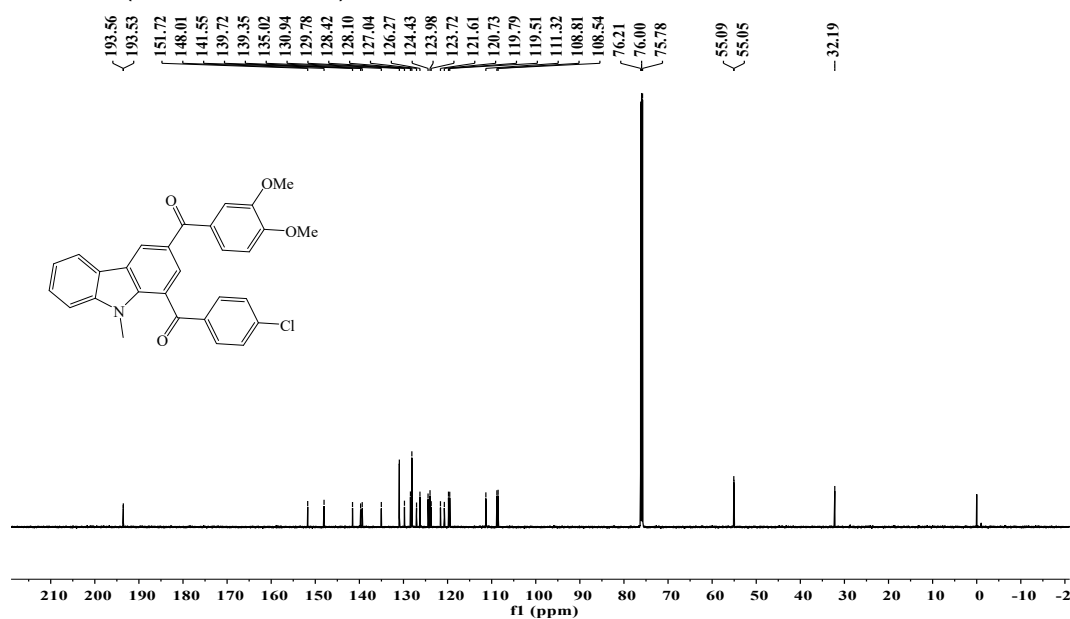

**(1-(4-chlorobenzoyl)-9-methyl-9H-carbazol-3-yl)(3,4-dimethoxyphenyl)methanone**

**(4q):** pale yellow. <sup>1</sup>H NMR (600 MHz, Chloroform-*d*) δ 8.66 (d, *J* = 1.5 Hz, 1H), 8.09 (d, *J* = 7.8 Hz, 1H), 7.89 (d, *J* = 1.5 Hz, 1H), 7.85 (d, *J* = 8.5 Hz, 2H), 7.51 (t, *J* = 7.7 Hz, 1H), 7.41 (dd, *J* = 8.4, 5.0 Hz, 4H), 7.35 (dd, *J* = 8.3, 1.9 Hz, 1H), 7.29 (t, *J* = 7.5 Hz, 1H), 6.85 (d, *J* = 8.3 Hz, 1H), 3.90 (s, 3H), 3.87 (s, 3H), 3.61 (s, 3H). <sup>13</sup>C NMR (600 MHz, Chloroform-*d*) δ 193.56, 193.53 (Cq each, C=O), 151.72, 148.01, 141.55, 139.72, 139.35, 135.02, 130.94, 129.78, 128.42, 128.10, 127.04, 126.27, 124.43, 123.98, 123.72, 121.61, 120.73, 119.79, 119.51, 111.32, 108.81, 108.54, 55.09, 55.05, 32.19.



<sup>1</sup>H NMR(600 MHz, CDCl<sub>3</sub>)

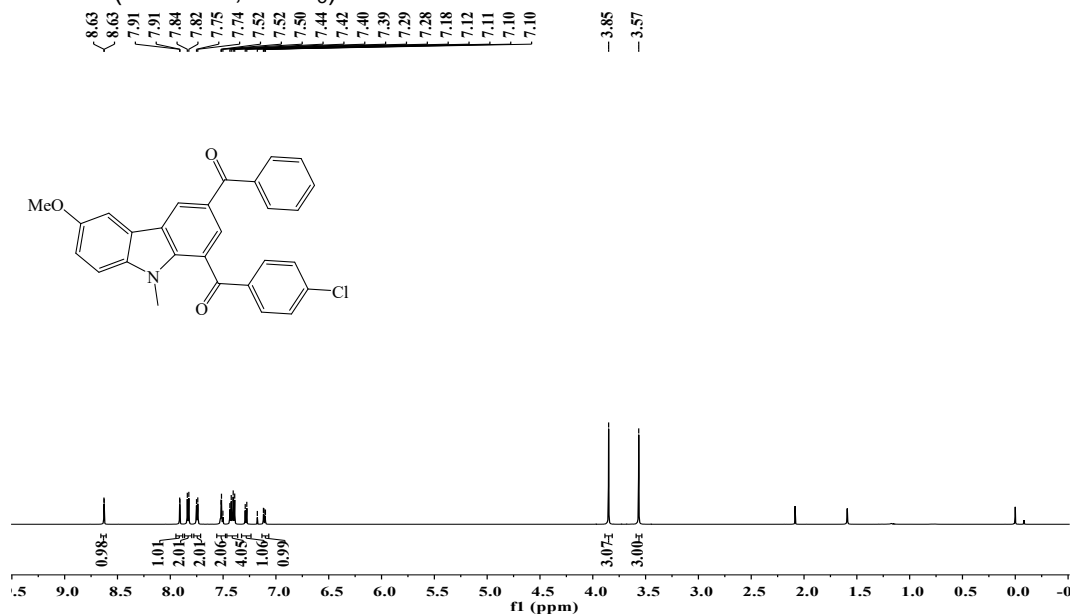

<sup>13</sup>C NMR(600 MHz, CDCl<sub>3</sub>)

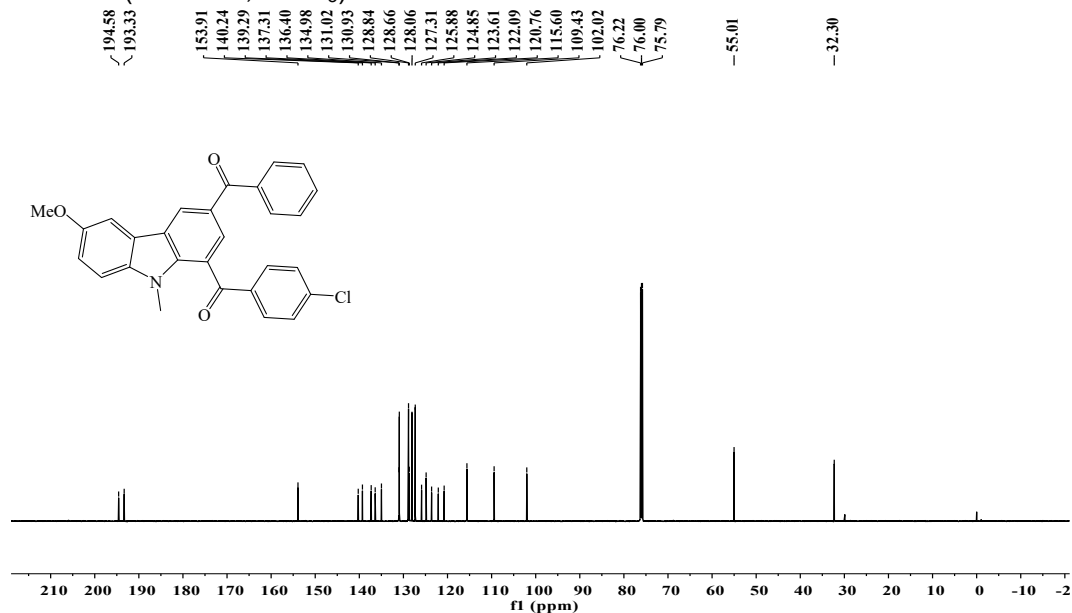

**(3-benzoyl-6-methoxy-9-methyl-9H-carbazol-1-yl)(4-chlorophenyl)methanone(4r):**

yellow solid. <sup>1</sup>H NMR (600 MHz, Chloroform-*d*) δ 8.63 (d, *J* = 1.5 Hz, 1H), 7.91 (d, *J* = 1.5 Hz, 1H), 7.83 (d, *J* = 8.5 Hz, 2H), 7.75 (d, *J* = 7.1 Hz, 2H), 7.56-7.48 (m, 2H), 7.41 (dd, *J* = 19.3, 8.1 Hz, 4H), 7.28 (d, *J* = 8.9 Hz, 1H), 7.11 (dd, *J* = 8.9, 2.4 Hz, 1H), 3.85 (s, 3H), 3.57 (s, 3H). <sup>13</sup>C NMR (600 MHz, Chloroform-*d*) δ 194.58, 193.33 (Cq each, C=O), 153.91, 140.24, 139.29, 137.31, 136.40, 134.98, 131.02, 130.93, 128.84, 128.66, 128.06, 127.31, 125.88, 124.85, 123.61, 122.09, 120.76, 115.60, 109.43, 102.02, 55.01, 32.30.

<sup>1</sup>H NMR(600 MHz, CDCl<sub>3</sub>)

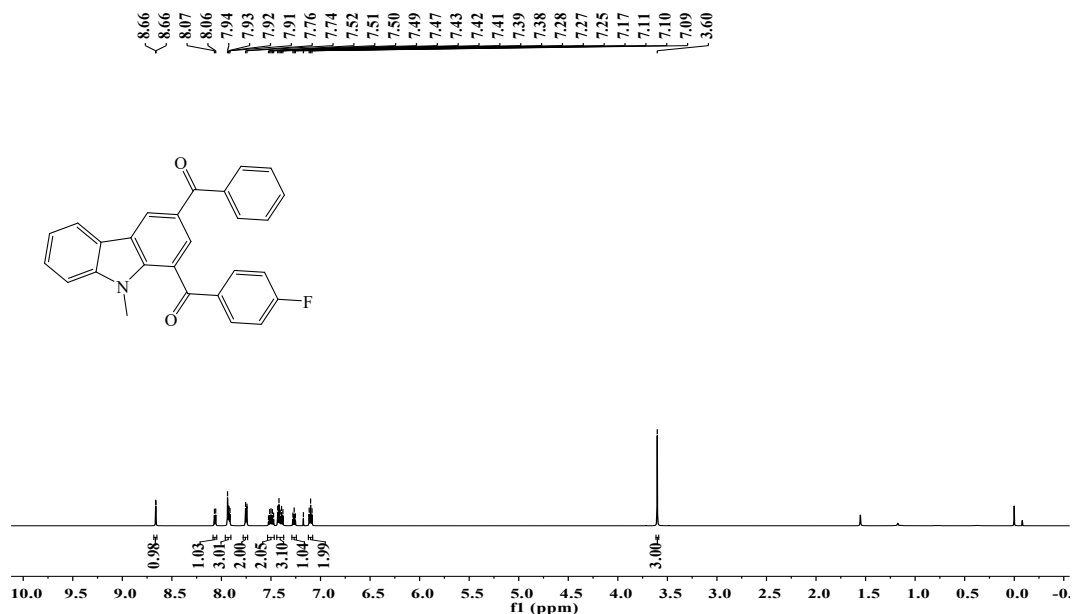

<sup>13</sup>C NMR(600 MHz, CDCl<sub>3</sub>)

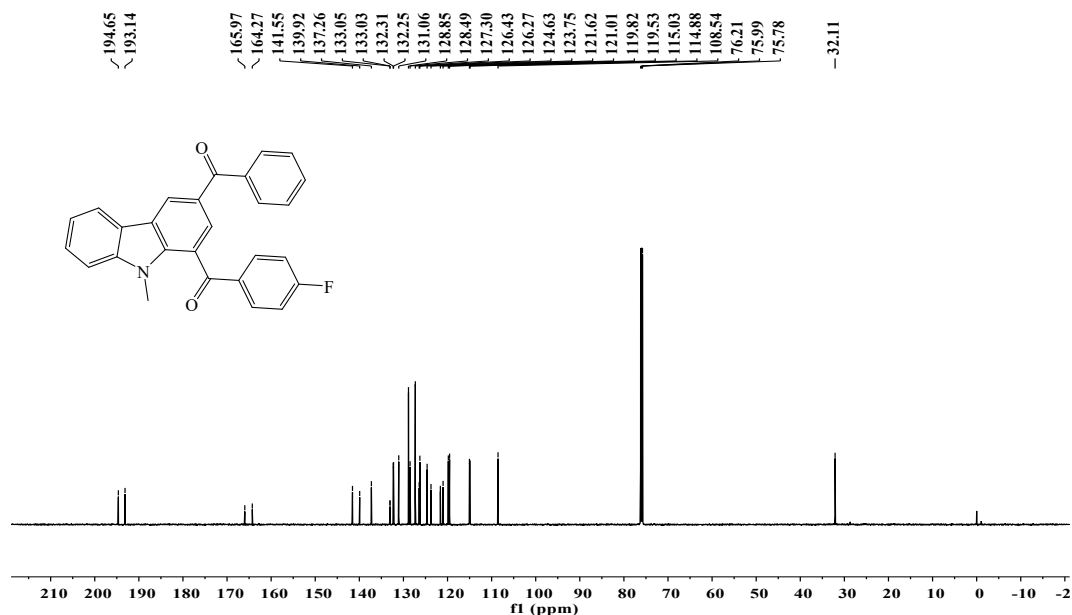

**(3-benzoyl-9-methyl-9H-carbazol-1-yl)(4-fluorophenyl)methanone (4s):** yellow solid.

<sup>1</sup>H NMR (600 MHz, Chloroform-*d*)  $\delta$  8.66 (d,  $J$  = 1.6 Hz, 1H), 8.06 (d,  $J$  = 7.8 Hz, 1H), 7.96-7.90 (m, 3H), 7.75 (d,  $J$  = 8.3 Hz, 2H), 7.50 (dt,  $J$  = 15.6, 7.3 Hz, 2H), 7.44-7.37 (m, 3H), 7.27 (t,  $J$  = 7.5 Hz, 1H), 7.10 (t,  $J$  = 8.6 Hz, 2H), 3.60 (s, 3H). <sup>13</sup>C NMR (600 MHz, Chloroform-*d*)  $\delta$  194.65, 193.14 (Cq each, C=O), 165.97, 164.27, 141.55, 139.92, 137.26, 133.05, 133.03, 132.31, 132.25, 131.06, 128.85, 128.49, 127.30, 126.43, 126.27, 124.63, 123.75, 121.62, 121.01, 119.82, 119.53, 115.03, 114.88, 108.54, 76.21, 75.99, 75.78, 32.11.

$^1\text{H}$  NMR(600 MHz,  $\text{CDCl}_3$ )

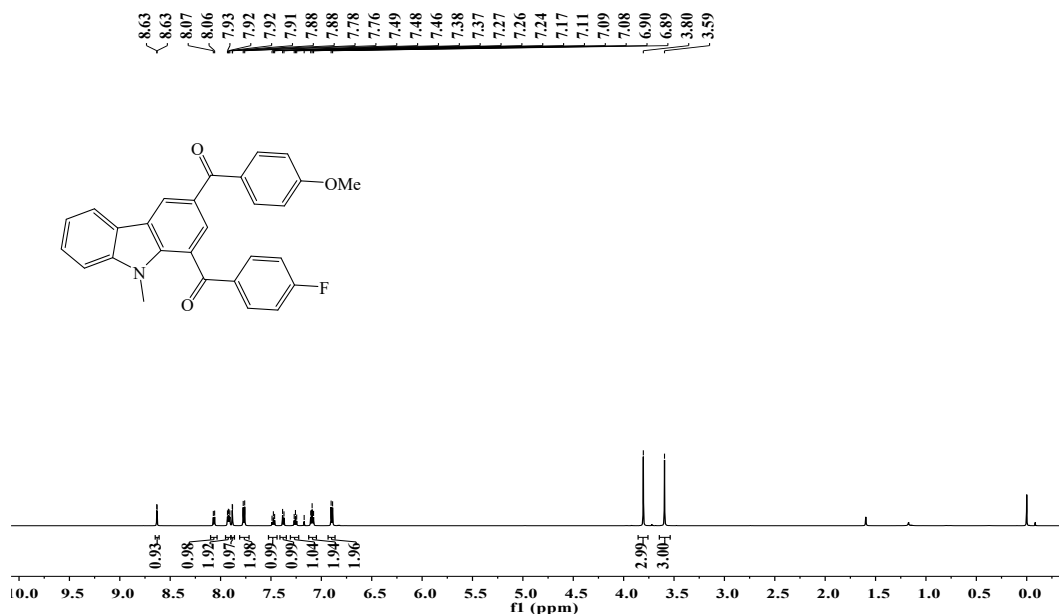

$^{13}\text{C}$  NMR(600 MHz,  $\text{CDCl}_3$ )

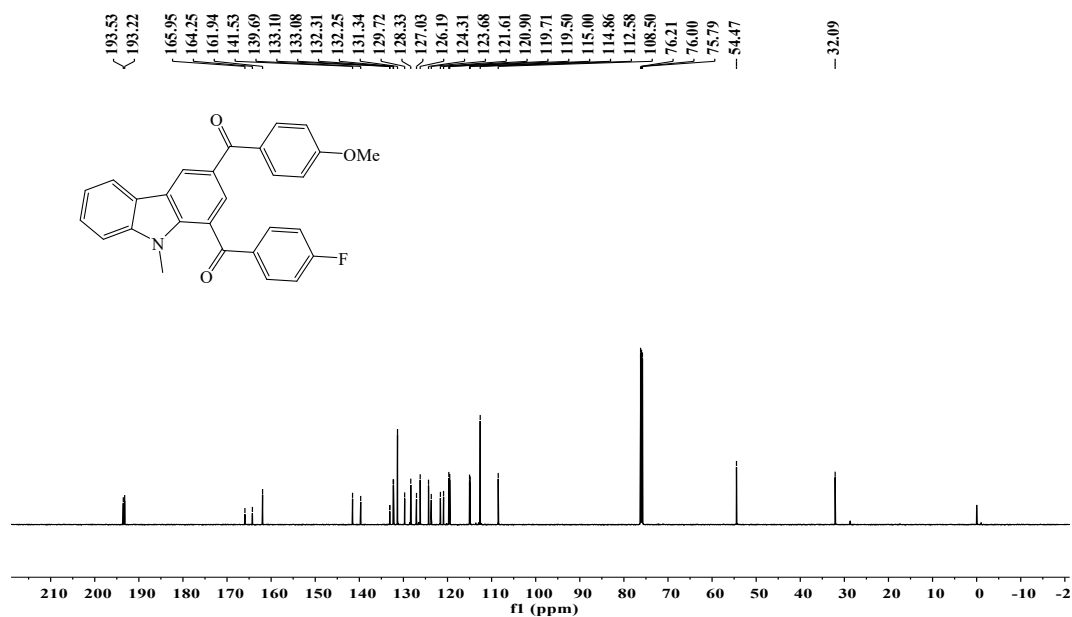

**(1-(4-fluorobenzoyl)-9-methyl-9H-carbazol-3-yl)(4-methoxyphenyl)methanone**

(4t) : yellow solid.  $^1\text{H}$  NMR (600 MHz, Chloroform-*d*)  $\delta$  8.63 (d,  $J$  = 1.5 Hz, 1H), 8.07 (d,  $J$  = 7.7 Hz, 1H), 7.92 (dd,  $J$  = 8.7, 5.4 Hz, 2H), 7.88 (d,  $J$  = 1.5 Hz, 1H), 7.77 (d,  $J$  = 8.7 Hz, 2H), 7.48 (t,  $J$  = 7.7 Hz, 1H), 7.38 (d,  $J$  = 8.2 Hz, 1H), 7.26 (t,  $J$  = 7.4 Hz, 1H), 7.09 (t,  $J$  = 8.5 Hz, 2H), 6.90 (d,  $J$  = 8.8 Hz, 2H), 3.80 (s, 3H), 3.59 (s, 3H).  $^{13}\text{C}$  NMR (600 MHz, Chloroform-*d*)  $\delta$  193.53, 193.22 (Cq each, C=O), 165.95, 164.25, 161.94, 141.53, 139.69, 133.10, 133.08, 132.31, 132.25, 131.34, 129.72, 128.33, 127.03, 126.19, 124.31, 123.68, 121.61, 120.90, 119.71, 119.50, 115.00, 114.86, 112.58, 108.50, 54.47, 32.09.

<sup>1</sup>H NMR(600 MHz, CDCl<sub>3</sub>)

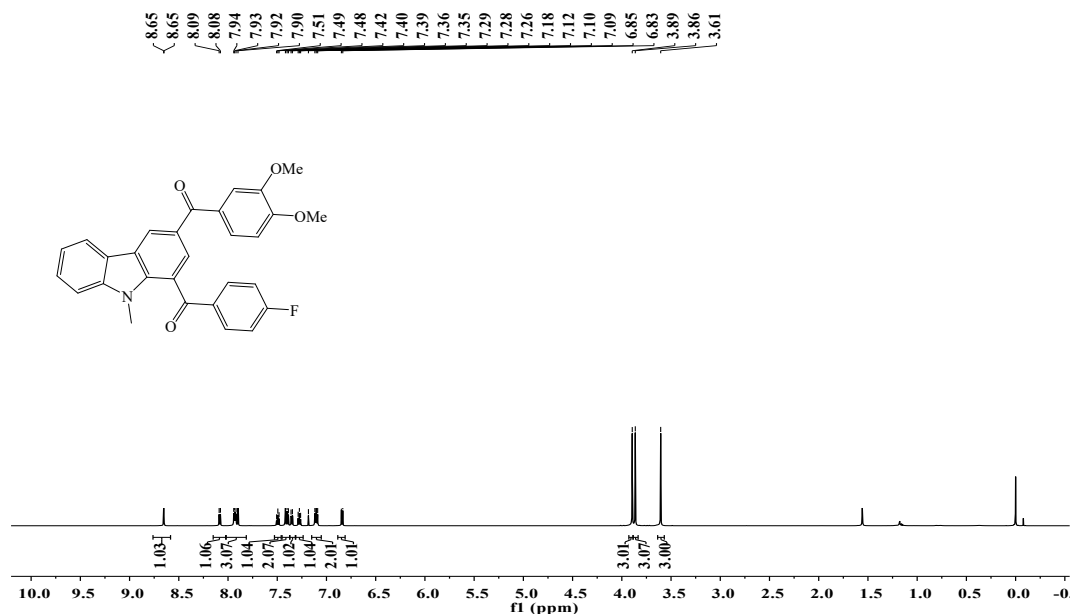

<sup>13</sup>C NMR(600 MHz, CDCl<sub>3</sub>)

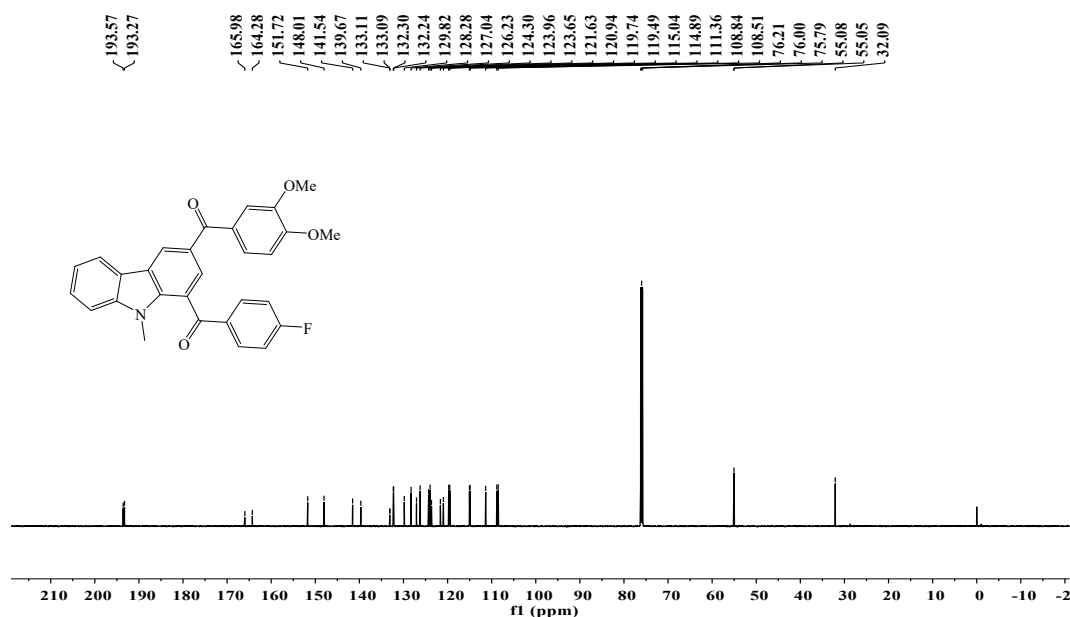

**(3-(3,4-dimethoxybenzoyl)-9-methyl-9H-carbazol-1-yl)(4-fluorophenyl)methanone**

**(4u):** white solid. <sup>1</sup>H NMR (600 MHz, Chloroform-*d*) δ 8.65 (d, *J* = 1.5 Hz, 1H), 8.08 (d, *J* = 7.8 Hz, 1H), 8.02-7.81 (m, 3H), 7.49 (t, *J* = 7.5 Hz, 1H), 7.45-7.37 (m, 2H), 7.35 (d, *J* = 8.3 Hz, 1H), 7.28 (t, *J* = 7.4 Hz, 1H), 7.10 (t, *J* = 8.5 Hz, 2H), 6.84 (d, *J* = 8.3 Hz, 1H), 3.89 (s, 3H), 3.86 (s, 3H), 3.61 (s, 3H). <sup>13</sup>C NMR (600 MHz, Chloroform-*d*) δ 193.57, 193.27 (Cq each, C=O), 165.98, 164.28, 151.72, 148.01, 141.54, 139.67, 133.11, 133.09, 132.30, 132.24, 129.82, 128.28, 127.04, 126.23, 124.30, 123.96, 123.65, 121.63, 120.94, 119.74, 119.49, 115.04, 114.89, 111.36, 108.84, 108.51, 55.08, 55.05, 32.09.

<sup>1</sup>H NMR(600 MHz, CDCl<sub>3</sub>)

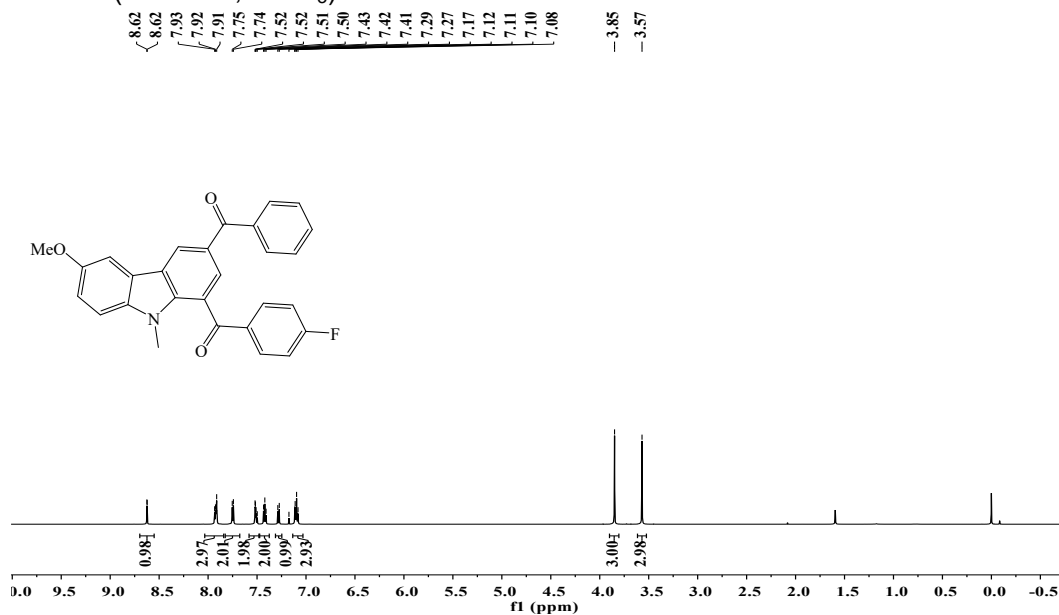

<sup>13</sup>C NMR(600 MHz, CDCl<sub>3</sub>)

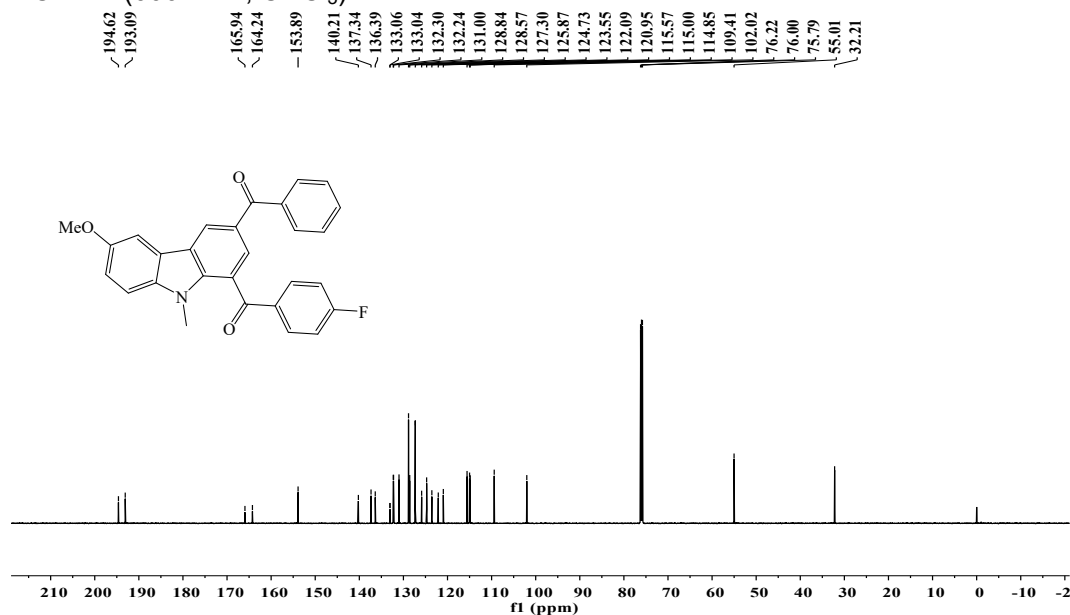

**(3-benzoyl-6-methoxy-9-methyl-9H-carbazol-1-yl)(4-fluorophenyl)methanone (4v):**

yellow solid. <sup>1</sup>H NMR (600 MHz, Chloroform-*d*) δ 8.62 (d, *J* = 1.6 Hz, 1H), 8.03-7.84 (m, 3H), 7.75 (d, *J* = 7.1 Hz, 2H), 7.58-7.48 (m, 2H), 7.42 (t, *J* = 7.7 Hz, 2H), 7.28 (d, *J* = 8.9 Hz, 1H), 7.14-7.03 (m, 3H), 3.85 (s, 3H), 3.57 (s, 3H). <sup>13</sup>C NMR (600 MHz, Chloroform-*d*) δ 194.62, 193.09 (Cq each, C=O), 165.94, 164.24, 153.89, 140.21, 137.34, 136.39, 133.06, 133.04, 132.30, 132.24, 131.00, 128.84, 128.57, 127.30, 125.87, 124.73, 123.55, 122.09, 120.95, 115.57, 115.00, 114.85, 109.41, 102.02, 76.22, 76.00, 75.79, 55.01, 32.21.

<sup>1</sup>H NMR(600 MHz, CDCl<sub>3</sub>)

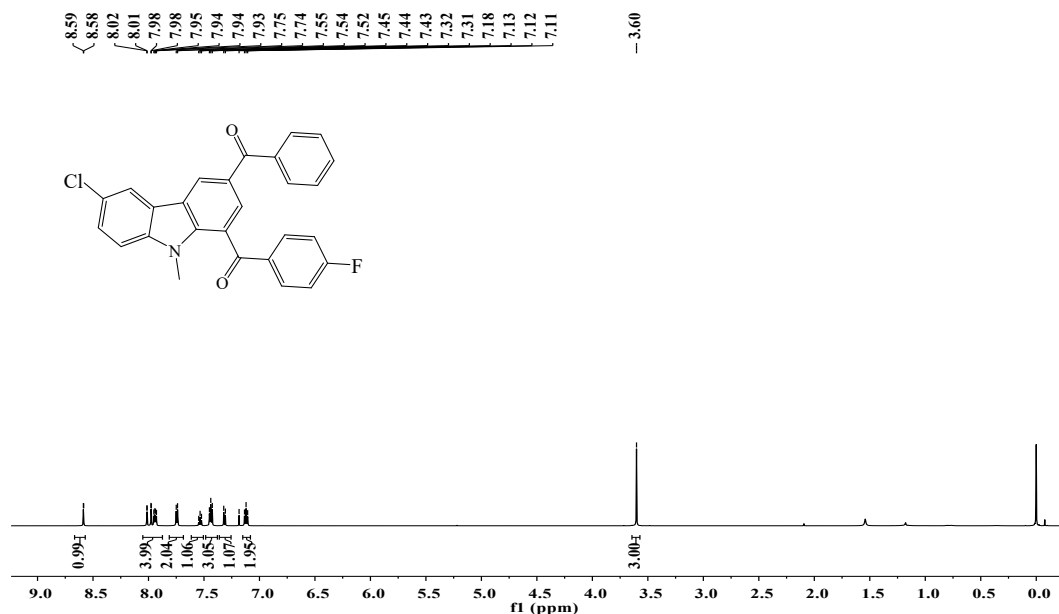

<sup>13</sup>C NMR(600 MHz, CDCl<sub>3</sub>)

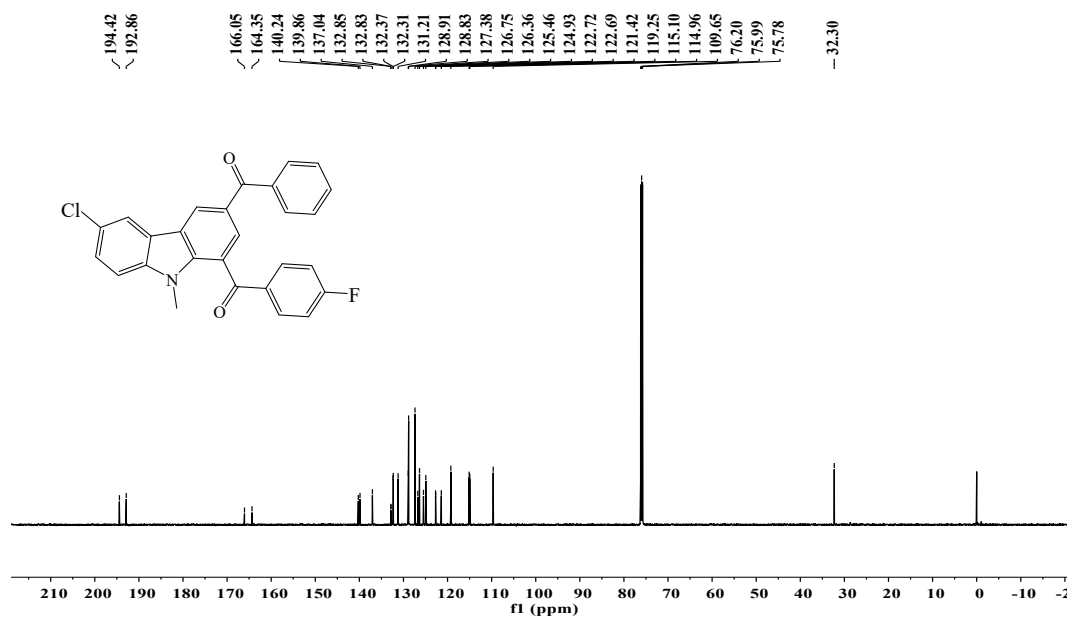

**(3-benzoyl-6-chloro-9-methyl-9H-carbazol-1-yl)(4-fluorophenyl)methanone (4w):** yellow solid. <sup>1</sup>H NMR (600 MHz, Chloroform-d)  $\delta$  8.59 (d,  $J$  = 1.6 Hz, 1H), 8.05-7.87 (m, 4H), 7.74 (d,  $J$  = 7.0 Hz, 2H), 7.54 (t,  $J$  = 7.4 Hz, 1H), 7.48-7.38 (m, 3H), 7.31 (d,  $J$  = 8.7 Hz, 1H), 7.12 (t,  $J$  = 8.5 Hz, 2H), 3.60 (s, 3H). <sup>13</sup>C NMR (600 MHz, Chloroform-d)  $\delta$  194.42, 192.86 (Cq each, C=O), 166.05, 164.35, 140.24, 139.86, 137.04, 132.85, 132.83, 132.37, 132.31, 131.21, 128.91, 128.83, 127.38, 126.75, 126.36, 125.46, 124.93, 122.72, 122.69, 121.42, 119.25, 115.10, 114.96, 109.65, 32.30.
